1 ***De novo* transcriptome sequence of *Senna tora* provides insights**  
2 **into anthraquinone biosynthesis**

3  
4 Sang-Ho Kang<sup>1,\*</sup>, †, Woo-Haeng Lee<sup>2,\*</sup>, Chang-Muk Lee<sup>3</sup>, Joon-Soo Sim<sup>3</sup>, So Youn Won<sup>1</sup>,  
5 So-Ra Han<sup>2</sup>, Soo-Jin Kwon<sup>1</sup>, Jung Sun Kim<sup>1</sup>, Chang-Kug Kim<sup>1,†</sup>, Tae-Jin Oh<sup>2,4,5,†</sup>

6  
7 <sup>1</sup>Genomics Division, National Institute of Agricultural Sciences, RDA, Jeonju, Korea; <sup>2</sup>Department of  
8 Life Science and Biochemical Engineering, SunMoon University, Asan, Korea; <sup>3</sup>Metabolic  
9 Engineering Division, National Institute of Agricultural Sciences, RDA, Jeonju, Korea; <sup>4</sup>Genome-  
10 based BioIT Convergence Institute, Asan, Korea; <sup>5</sup>Department of Pharmaceutical Engineering and  
11 Biotechnology, SunMoon University, Asan, Korea

12  
13 \* These authors contributed equally to this work.

14  
15 †Corresponding author: Sang-Ho Kang; Chang-Kug Kim; Tae-Jin Oh

16 E-mail: [hosang93@korea.kr](mailto:hosang93@korea.kr); Tel: +82-63-238-4570; Fax: +82-63-238-4554

17 E-mail: [chang@korea.kr](mailto:chang@korea.kr); Tel: +82-63-238-4555; Fax: +82-63-238-4554

18 E-mail: [tjoh3782@sunmoon.ac.kr](mailto:tjoh3782@sunmoon.ac.kr); Tel: +82-41-530-2677; Fax: +82-41-530-2279

19

## 20 **Abstract**

21

22 *Senna tora* is an annual herb with rich source of anthraquinones that have tremendous  
23 pharmacological properties. However, there is little mention of genetic information for this  
24 species, especially regarding the biosynthetic pathways of anthraquinones. To understand the  
25 key genes and regulatory mechanism of anthraquinone biosynthesis pathways, we performed  
26 spatial and temporal transcriptome sequencing of *S. tora* using short RNA sequencing (RNA-  
27 Seq) and long-read isoform sequencing (Iso-Seq) technologies, and generated two unigene  
28 sets composed of 118,635 and 39,364, respectively. A comprehensive functional annotation  
29 and classification with multiple public databases identified array of genes involved in major  
30 secondary metabolite biosynthesis pathways and important transcription factor (TF) families  
31 (MYB, MYB-related, AP2/ERF, C2C2-YABBY, and bHLH). Differential expression  
32 analysis indicated that the expression level of genes involved in anthraquinone biosynthetic  
33 pathway regulates differently depending on the degree of tissues and seeds development.  
34 Furthermore, we identified that the amount of anthraquinone compounds were greater in late  
35 seeds than early ones. In conclusion, these results provide a rich resource for understanding  
36 the anthraquinone metabolism in *S. tora*.

37

## 38 **Key words**

39 *Senna tora*, anthraquinone, secondary metabolite, transcriptome analysis, transcription factor

## 40 Introduction

41 *Senna tora* (Subfamily, Caesalpiniaceae; and Family, Leguminosae) also known as  
42 *Cassia tora*, is an annual xerophytic shrub which grows in the arid zones after the rainy  
43 season [1]. This plant is mostly found in India, China, Sri Lanka, Nepal, the Korean  
44 peninsula, and other Asian countries. Its name varies in different locales such as Foetid Senna  
45 tora, Sickle senna, Wild senna, Coffee pod, Tovara, Chakvad, and Ringworm plant. *S. tora*  
46 leaves, seeds, and roots have long been used as food ingredients. It is also valued as a  
47 medicinal plant in Ayurveda, commonly used as a depurative, antiperiodic, anthelmintic,  
48 liver tonic, hepatic disorders, dyspepsia leprosy, constipation, intermittent fever, cough,  
49 bronchitis, ringworm infection, ophthalmic, skin diseases, and others [2, 3]. It has also been  
50 used as laxative and a tonic, and is popularly served as a roasted tea throughout Korea and  
51 China [4]. The seeds of *S. tora* contain a variety of bioactive anthraquinone substances,  
52 including chrysophanol, obtusin, obtusifolin, aurantio-obtusin, chyro-obtusin, obstusifolin,  
53 emodin, rubrofusarin, gentibioside, and rhein. Chrysophanol is primarily responsible for the  
54 plant's pharmacological properties [5, 6]. *S. tora* mainly contains anthraquinone glycosides  
55 and flavonoids [7]. Recently, *S. tora* seed extract (STE) and its active compound aurantio-  
56 obtusin have been found to suppress degranulation, histamine production, and reactive  
57 oxygen species generation, and also to inhibit the production and mRNA expression of  
58 cyclooxygenase 2. STE and aurantio-obtusin also suppressed IgE-mediated FcεRI such as  
59 phosphorylation of Syk, protein kinase C $\mu$ , phospholipase C $\gamma$ , and extracellular signal-  
60 regulated kinases. This suggests that STE and aurantio-obtusin can be beneficial to the  
61 treatment of allergy-related diseases [8].

62 Anthraquinones, secondary metabolites occurring in bacteria, fungi, lichens, and  
63 higher plants, seem to originate from a variety of different precursors and pathways. There

64 are two pathways leading to anthraquinone biosynthesis in higher plants: the polyketide  
65 pathway and the chorismate/*O*-succinylbenzoic acid pathway. The latter occurs in the plant  
66 family Rubiaceae and synthesizes aromatic compounds known for a broad spectrum of  
67 bioactivity, such as anticancer, cathartic, anti-inflammatory, anti-microbial, diuretic,  
68 vasorelaxing, and phytoestrogen activities, and has recently shown therapeutic potential in  
69 autoimmune diabetes [9]. Emodin, physicion, aloe-emodin, and rhein isolated from *S. tora*  
70 seed shows antifungal properties against phytopathogenic fungi [10]. Likewise, rhein shows  
71 high antibacterial activity towards *Porphyromonas gingivalis* and synergistic antibacterial  
72 activity with metronidazole or natural compounds, and the recent studies suggest the  
73 immunomodulatory activity of rhein [11-13]. The extract of *S. tora* is found to have  
74 hypolipidemic activity, hepatoprotective, and antioxidant effects [2, 14, 15]. Anthraquinones  
75 from *S. tora* exhibit significant inhibitory properties against angiotensin-converting enzyme  
76 (ACE). Among the various anthraquinones, only anthraquinone glycoside demonstrates  
77 marked inhibitory activity against ACE [16].

78 RNA sequencing (RNA-Seq), a technology that can be used to profile the complete  
79 gene space of various organisms due to their high throughput, accuracy, and reproducibility,  
80 has accelerated the discovery of new genes or analysis of tissue-specific and functional  
81 expression patterns in large, complex genomes like those of plants [17-19]. But in the  
82 absence of reference genome information considerable small transcripts hinder the accuracy  
83 of the construction of RNA sequencing libraries and the efficiency of functional gene  
84 prediction or annotation. Short-length RNA sequencing data limit the creation of a longer,  
85 accurate contig assembly, resulting in chimeric contigs and/or low gene annotation [20].  
86 Moreover, small laboratories require high sequencing costs due to the need for long reads and  
87 high-depth short read sequences to be accurate in *de novo* assembly. Plants with large

88 genomes pose even more difficult as in, for example, the common soybean crop, which has a  
89 genome size of ~1.1Gb [21]. To improve the comprehensive accuracy of gene prediction,  
90 there is a need to introduce a new approach, the “Isoform sequencing (Iso-Seq).” Thanks to  
91 its long-read technology, Iso-Seq facilitates identifying new isoforms with a high level of  
92 accuracy [22]. Advances in technology enable long reads in the range of 1.5-10 kb, which are  
93 able to provide full-length mRNA isoforms, detect new isoforms, and skip the transcript  
94 reconstruction process by identifying isoforms directly [23]. In this study, we present the  
95 transcriptome analysis of the plant *S. tora* from 4 different sources using RNA-Seq and Iso-  
96 Seq, providing insights of key genes involved in anthraquinone biosynthesis in the  
97 pharmacologically important herb *S. tora*.

98

## 99 **Materials and methods**

### 100 **Plant material and RNA preparation**

101 Specimens of *S. tora* (cv. Myeongyun) grown in an experimental plot of National  
102 Institute of Horticultural and Herbal Science (Eumseong) field were used for transcriptome  
103 analysis. Leaf, root, and early- and late-stage seed tissues were harvested from healthy plants,  
104 and stored at -80°C until used for RNA extraction. Total RNA was extracted from leaves,  
105 roots, and two stages of seeds of *S. tora* using the RNeasy Plant Mini kit (Qiagen, InS.,  
106 Valencia, CA, USA). RNA purity was determined using NanoDrop8000 Spectrophotometer  
107 and Agilent Technologies 2100 Bioanalyzer, and total RNA integrity was identified as having  
108 a minimum integrity value of 7.

109

### 110 **Illumina short-read sequencing**

111 The poly (A)<sup>+</sup> mRNA was purified and fragmented from 1 µg of total RNA using  
112 poly-T oligo-attached magnetic beads by two rounds of purification. Using reverse  
113 transcriptase, random hexamer primers, and dUTP, the randomly-cleaved RNA fragments  
114 were transcribed reversely into first-strand cDNA. A single A-base was added to these cDNA  
115 fragments followed by adapter ligation. The products were purified and concentrated by PCR  
116 in order to generate a final-strand specific cDNA library. The quality of the amplified  
117 libraries was verified using capillary electrophoresis (Bioanalyzer, Agilent). Quantitative  
118 PCR (qPCR) was carried out using SYBR Green PCR Master Mix (Applied Biosystems).  
119 Then we pooled together equimolar amounts of libraries that were index-tagged. The cBot-  
120 automated cluster creation system (Illumina) performed cluster generation in the flow cell.  
121 The sequencing was performed with 2 x 100 bp read length of the flow cell loaded on a  
122 HiSeq 2500 sequencing system (Illumina).

123

## 124 **Long-read sequencing**

125 Libraries for Pacific Biosciences Single Molecule Real Time (SMRT) sequencing  
126 were prepared from the aforementioned cDNAs. Cycle optimization was performed to  
127 determine the optimal number of cycles for large-scale PCR. We prepared 3 fraction cDNAs  
128 (1-2 kb, 2-3 kb, and 3-6 kb) using the BluePippin Size selection system. The SMRTbell  
129 library was constructed by using SMRTbell™ Template Prep Kit (PN 100-259-100). The  
130 DNA/Polymerase Binding Kit P6 (PacBio) was used for DNA synthesis after the sequencing  
131 primer annealed to the SMRTbell template. Following the polymerase binding reaction, the  
132 MagBead Kit was used to bind the library complex with MagBeads before sequencing.  
133 MagBead-bound cDNA complexes result in increased number of reads per SMRT cell. This  
134 polymerase-SMRTbell-adaptor complex was then loaded into zero-mode waveguides

135 (ZMWs). The SMRTbell library was sequenced using 8 SMRT cells (Pacific Biosciences)  
136 with C4 chemistry (DNA sequencing Reagent 4.0). 1 × 240 minute movies were captured for  
137 each SMRT cell using the PacBio RS II sequencing platform.

138

## 139 **De novo transcriptome assembly and sequence clustering**

140 Raw data of the *S. tora* transcriptome generated from Illumina HiSeq were  
141 preprocessed to remove nonsense sequences including adaptors, primers, and low quality  
142 sequences (Phred quality score of less than 20) using NGS QC Toolkit [24]. The raw data  
143 were further processed to remove ribosomal RNA using riboPicker v0.4.3 [25]. The  
144 preprocessed reads were then assembled using Trinity [26]. Assembly statistics were  
145 calculated using in-house Perl scripts. Assembled transcripts were clustered (CD-HIT-EST  
146 v4.6.1) [27] in order to reduce sequence redundancy. Sequence identity threshold and  
147 alignment coverage (for the shorter sequence) were both set as 90% to generate clusters. Such  
148 clustered transcripts are defined as reference transcripts in this work.

149

## 150 **Illumina expression quantification and differential expression** 151 **analysis**

152 The cleaned reads from each tissue were aligned with the abundant transcriptome  
153 assembly using Bowtie2 [28]. The aligned reads were quantified as fragments per million  
154 reads (FPKM) against non-redundant combined transcript sequences (at 90% sequence  
155 similarity by CD-HIT-EST). The reads counting of alignments was performed using RSEM  
156 (RNA-Seq by Expectation Maximization)-1.2.25 [29]. The differential expression analysis  
157 was performed using the DESeq2 packages [30]. Differentially expressed genes (DEGs) were

158 identified using the combined criteria of a more than twofold change and significance with P-  
159 value threshold of 0.001 based on the three biological replicates.

160

## 161 **Functional annotation and classification**

162 All the assembled unigenes were annotated by BLAST program [31] against the  
163 National Center for Biotechnology Information (NCBI) nonredundant (Nr) protein database,  
164 the Swiss-Prot protein database, and the Kyoto Encyclopedia of Genes and Genomes  
165 (KEGG) pathways database with an E-value cutoff of  $10^{-5}$ . The best aligning results were  
166 selected to annotate the unigenes. Whenever the aligning results from different databases  
167 conflicted, the results from Swiss-Prot database were preferentially selected, followed by Nr  
168 database and KEGG database. Functional categorization by Geno Ontology (GO) terms [32]  
169 was carried out by Blast2GO program [33] with E-value threshold of  $10^{-5}$ . AgriGO [34] was  
170 used to determine over-representation of GO categories (e.g., biological processes).

171

## 172 **Identification of transcription factor families**

173 To investigate the putative transcription factor families in *S. tora*, unigenes were  
174 mapped against all the transcription factor protein sequences made available by the Plant  
175 Transcription Factor Database (PlantTFDB 4.0; <http://planttfdb.cbi.pku.edu/download.php>)  
176 using BLASTX with E-value threshold of  $10^{-5}$ .

177

## 178 **Quantitative RT-PCR analysis**

179 Total RNA was extracted by using the RNeasy Plant Mini Kit (Qiagen, Valencia,  
180 CA, USA) following the manufacturer's instructions. The quality of the isolated RNA was



181 checked on ethidium bromide-stained agarose gels, and its concentration was calculated  
182 according to the measured optical density (OD) of the samples at 260 and 280 nm  
183 (DropSense96C Spectrophotometer, Trinean, Belgium). The 1  $\mu$ g of the total RNA was used  
184 for the cDNA synthesis using SuperScript<sup>TM</sup> III first strand RT-PCR kit (Invitrogen,  
185 Carlsbad, CA, USA) with an oligo(dT)<sub>20</sub> primer. After cDNA was obtained from *S. tora*,  
186 qRT-PCR was performed using gene-specific primers (S1 Table). Real-time PCR analysis  
187 was optimized and performed using the Roche LightCycler<sup>®</sup> 480 II instrument and SYBR<sup>®</sup>  
188 Green Real-Time PCR Master Mix (Bio-Rad, InS., Hercules, CA, USA) under condition of  
189 an initial denaturation at 95°C for 30 s followed by 40 cycles of denaturation at 95°C for 10 s,  
190 annealing and extending at 55°C for 15 s. The relative expression of specific genes was  
191 quantified using the  $2^{-\Delta\Delta C_t}$  calculation according to the manufacturer's software [35] (where  
192  $\Delta\Delta C_t$  is the difference in the threshold cycles), and the internal reference gene was the  
193 elongation factor 2 for data normalization. Reliability of the amplification parameters was  
194 analyzed at 1:15 dilutions of the cDNA samples. The mean threshold cycle values for the  
195 genes of interest were calculated from three experimental replicates.

196

## 197 **Extraction of anthraquinones and LC-MS analysis**

198 Early- and late-stage of seed samples were extracted with methanol using sonication  
199 for 30 min at 60°C. After extraction, samples were centrifuged at 12,000 rpm for 3 min at  
200 25°C and the supernatant was filtered with 0.2  $\mu$ m Acrodisc<sup>®</sup> MS Syringe Filters with  
201 WWPTFE membrane (Pall Corporation, Port Washington, NY, USA). Quantitative analysis  
202 of anthraquinones was performed by a Triple TOF 5600+ Spectrometer with a DuoSpray ion  
203 source (AB Sciex, Ontario, CA, USA) coupled with a Nexera X2 UHPLC (Shimadzu, Kyoto,  
204 Japan) equipped with binary solvent manager, sample manager, column heater, and

205 photodiode array detector. UHPLC was performed on a ACQUITY UPLC®BEH C18  
206 column (1.7 µm, 2.1 x 100 mm, Waters Corporation, Milford, USA) and mobile phases  
207 consisted of 5 mM ammonium acetate in water (eluent A) and 100% acetonitrile (eluent B).  
208 The gradient profile was as follows: 0-1 min, 20% B; 1-3.5 min, 10-30% B; 3.5-8 min, 30-  
209 50% B; 8-12 min, 50-100% B; 11-17 min, 100% B. The flow rate was 0.5 mL/min and five  
210 microliters of samples were injected. For detecting peaks from test samples, MS parameter in  
211 ESI-negative mode was used as follows: nebulizing gas, 50 psi; heating gas, 50 psi; curtain  
212 gas, 25 psi; desolvation temperature, 500°C; ion spray voltage floating, 4.5 kV.

213

## 214 **Data availability**

215 The RNA-Seq and Iso-Seq sequences generated from Illumina and PacBio RS II  
216 sequencing of four tissue samples of *S. tora* were deposited at the National Center for  
217 Biotechnology Information (NCBI) Sequence Read Archive database with the accession  
218 number SRP159435.

219

## 220 **Results and discussion**

### 221 **RNA sequencing and de novo transcriptome assembly**

222 *De novo* transcriptome analysis is a good tool for generating the overall genetic  
223 information of an organism without full genome sequencing and leads to discoveries of new  
224 genes, molecular markers, and tissue-specific expression patterns. We used the Illumina  
225 HiSeq 2500 system and PacBio RS II platform to sequence the cDNA libraries of the leaf,  
226 root, and early- and late-stages of seed for elucidating secondary metabolites biosynthesis and  
227 understanding their spatial and temporal expression pattern in *S. tora*. Illumina HiSeq 2500

228 sequencing platform produced 278,031,495 raw reads and averaged 23,169,291 reads per  
229 tissue (S2 Table). In total, more than 270 million reads showed high quality read rates (Q30  
230 values) of over 88.00% (S2 Table). The Trinity assembler from the four different libraries  
231 generated a total of 118,635 unigenes that were more than 300 base pairs (bp) long (Fig 1).  
232 The length of the transcripts varied from 300 to 18,622 bp with an average length of 832.25  
233 bp, the N50 length of 1,082 bp, and the GC content of 39.51% (Table 1).

234 A unigene, the assembled transcript that represents a hypothetical gene, can be  
235 represented by several isomers as different forms of the same protein. The PacBio RS II  
236 sequencing platform produced 768,745 raw reads. After classification and clustering, 118,703  
237 high-quality isoforms were obtained from three different libraries, which contained 39,672,  
238 32,954, and 46,077 high-quality isoforms per library sizes (<2 kb, 2-3 kb, and >3 kb) (S3  
239 Table). The 118,703 high-quality isoforms from three different libraries generated 39,364  
240 non-redundant unigenes after the CD-HIT-EST program removed redundant isoforms. The  
241 total size of the assembly was 112 MB with 57% of transcripts larger than 500 bp and 12%  
242 larger than 2,000 bp. In total, our analysis generated two unigene sets: 118,635 from RNA-  
243 Seq and 39,364 from Iso-Seq (Fig 1). The two unigene sets showed similar GC contents.  
244 However, overall unigene lengths of each set showed that the length of the Iso-Seq was  
245 longer than RNA-Seq. Unigenes obtained from Iso-Seq were better in terms of minimum  
246 length, average length, and N50 length (Table 1).

247 In our analyses, we used the Iso-Seq unigene set mainly as a reference for RNA-Seq  
248 data. Due to other dissimilar characteristics, such as the transcript length between the RNA-  
249 Seq and Iso-Seq gene sets, this study did not constitute an integrated unigene set. Later, we  
250 plan to create one using the reference-guided method when the *S. tora* genome sequencing is  
251 completed.

252

## 253 **Functional annotation and classification**

254 Annotation of function is required to characterize transcripts and understand the  
255 complexity and diversity of an organism. For the functional annotation, the assembled  
256 118,635 unigenes obtained from RNA-Seq of leaf, root, early seed, and late seed tissue  
257 samples were screened using an FPKM criterion of  $\geq 1$ , which resulted in 56,707 unigenes.  
258 To obtain the best annotations, assembled 56,707 RNA-Seq unigene sets and 39,364 Iso-Seq  
259 unigene sets of *S. tora* were aligned with four public protein databases. We used the  
260 BLASTX program against NCBI Nr, Swiss-Prot, KEGG, and GO protein databases with an  
261 E-value threshold of  $1e-5$ . Annotations of RNA-Seq and Iso-Seq unigenes resulted in the  
262 identification of 43,286 and 36,882 unigene sets, which were respectively matched with  
263 known proteins. The Venn diagram displays the unique best BLASTX hits from NCBI Nr,  
264 Swiss-Prot, KEGG, and GO databases ([S1 Fig](#)). The overlapping regions of the four circles  
265 indicate the number of unigenes sharing BLASTX similarities in respective databases. The  
266 Venn diagram of RNA-Seq showed significant matches: 32,469 to Swiss-Prot (75.01%),  
267 42,552 to NCBI Nr (98.30%), 3,279 to KEGG (7.58%), and 30,287 to GO terms (69.97%).  
268 So did the Venn diagram of Iso-Seq: 30,626 to Swiss-Prot (83.04%), 36,830 to NCBI Nr  
269 (99.86%), 6,441 to KEGG (17.46%), and 26,762 to GO terms (72.56%). In summary, 43,286  
270 RNA-Seq and 36,882 Iso-Seq unigene sets had at least one significant protein match to these  
271 databases. The pattern of annotation of RNA-Seq and Iso-Seq showed that the Iso-Seq is  
272 better than RNA-Seq at annotating essential data. Non-significant genes that may represent  
273 new genes, non-coding RNA, or RNA representing unnecessary information is not evaluated  
274 in this annotation, and further analysis is required. Matches to the Nr database also indicated  
275 that a large number of the *S. tora* unigenes closely matched the sequences of *Glycine max*

276 (26.94%), *Glycine soja* (13.07%), *Vigna radiate* var. *radiata* (3.21%), *Cicer arietinum*  
277 (9.38%), and *Phaseolus vulgaris* (5.63%). Unigenes of 15 species in the Nr database had >  
278 1% match with those of *S. tora* (S2 Fig).

279 To further functionally characterize the *S. tora* transcriptome, we classified the functions  
280 of RNA-Seq and Iso-Seq unigenes using GO analysis. The distribution of RNA-Seq and Iso-  
281 Seq unigene sets in different GO categories is shown in Fig 2. The three main categories of  
282 GO annotations of RNA-Seq included 26,616 GO terms (42.12%) for biological process,  
283 20,211 terms (31.98%) for molecular function, and 16,365 terms (25.90%) for cellular  
284 component. Among biological process, organic substance metabolic process (17.00%) and  
285 primary metabolic process (16.00%) were the most abundant GO categories. Regarding  
286 molecular function, GO terms related to organic cyclic compound binding (19.00%) and  
287 heterocyclic compound binding (19.00%) were the most abundant, while cell part (22.00%)  
288 and cell (22.00%) were the mostly represented GO categories in cellular components.  
289 Conversely, the three main categories of GO annotation of Iso-Seq include 57,137 GO terms  
290 (45.64%) for biological process, 31,562 terms (25.13%) for molecular function, and 36,876  
291 terms (29.37%) for cellular component. Among biological process, organic substance  
292 metabolic process (16.00%) and primary metabolic process (16.00%) were the most abundant  
293 GO categories of biological process. The GO terms related to nucleotide binding (16.00%)  
294 and nucleoside phosphate binding (16.00%) were the most abundant in molecular function  
295 categories. Also, the most abundant GO categories in cellular component were cell part  
296 (24.00%) and cell (24.00%). GO terms pattern of RNA-Seq and Iso-Seq was similar in  
297 patterns.

298 Transcription factor (TF) families, including ARF, bHLH, bZIP, C2H2, ERF, MIKC,  
299 MYB, NAC, and WRKY, play a key regulatory role in the expression of genes, which are

300 involved in plant secondary metabolism and response to environmental stress, by binding to  
301 specific cis-regulatory elements of the promoter regions. The number of genes encoding for  
302 different TF families varies in different plants to perform species-/tissue-specific or  
303 developmental stage-specific function [36]. In our study, 3,284 RNA-Seq and 3,576 Iso-Seq  
304 were generated with a total of 6,860 unigenes assigned to 56 TF families. Among these,  
305 bHLH (521, 15.86%) were found to be the most abundant in RNA-Seq followed by WRKY  
306 (243, 7.40%), C2H2 (189, 5.76%), MYB (177, 5.39%), bZTP (170, 5.18%), and NAC (150,  
307 4.57%). Similarly, in the Iso-Seq, bHLH were found to be the most abundant followed by  
308 WRKY, but the other TF families showed a slight ranking change ([S3A Fig](#)).

309 Expression of the gene varies depending on the environment in which each species is  
310 exposed, and specific or large amounts of the gene are expressed. The degree of expression of  
311 the TF family, which mediates and controls their expression, is essential for the molecular  
312 genetics of organisms, so in order to investigate tissue specific gene expression in *S. tora* we  
313 studied the expression of genes in leaf, root and early and late seed tissues. Interestingly,  
314 different expression patterns for TFs were observed in four tissues of *S. tora*. Some TFs were  
315 unique to each tissue, whereas others were enriched in respective tissues. The 35 and 98 TFs  
316 among a total of 133 TFs expressed in leaf, 41 and 97 from 138 TFs in root, 30 and 51 from  
317 81 TFs in early-stage, and 15 and 18 from 33 TFs in late-stage during seed development were  
318 tissue-enriched and -specific ([S3B Fig](#)). Notably, growth regulating factor (GRF) in the TF  
319 family was dominantly expressed in late-stage seed tissue ([S4 Table](#)). GRFs are plant-specific  
320 transcription factors that were originally identified for their roles in stem and leaf  
321 development [37]. However, recent studies highlight its importance in other central  
322 developmental processes including root development, flower, and seed formation. Expression  
323 of GRFs has also been observed in various rice and maize tissues, suggesting their

324 involvement in seed development [38, 39].

325

## 326 **Differential gene expression analysis during seed development**

327 To compare genes of *S. tora* with differential expression level in late-stage seed  
328 development to those in early-stage development, we used the DESeq method. The  
329 transcripts with log<sub>2</sub> fold change (FC) >1 and p-value < 1e-3 were considered as  
330 differentially expressed genes (DEGs). Pair-wise comparison of transcripts between early-  
331 and late-stages of seed development resulted in a total of 14,825 DEGs in RNA-Seq. As  
332 seeds matured, 4,935 genes were identified as up-regulated and 9,890 genes were down-  
333 regulated. These genes belong to diverse functional groups including glycosyl hydrolases,  
334 dehydrogenases, transferases, kinases, phosphatases, cytochrome P450, oxygenases, and  
335 hormone-responsive proteins. A heat map was constructed to cluster the top 50 DEGs based  
336 on the similarity and diversity of expression profiles using normalized FPKM values within a  
337 range of 6 to 16 (Fig 3). Specifically, transcripts of various proteins are expressed differently  
338 depending on the tissue and stage of seed. In early-stage seeds, the expression of chalcone  
339 synthase, peroxidase, and cell wall/vacuolar inhibitor of fructosidase were higher than those  
340 of late-stage seeds. In particular, C/VIF releases glucose and fructose in irreversible  
341 reactions, which is essential to plant growth, storage compound accumulation, and stress  
342 response [40]. Conversely, in late-seed development, late embryogenesis-abundant (LEA)  
343 proteins and heat shock proteins (HSPs) appeared to be more abundant than early seeds like  
344 the adlay species [41].

345 Previously, the expression of genes in leaves, roots, and early- and late-seed tissues were  
346 examined to investigate the tissue-specific gene expression of *S. tora*. During this process the  
347 transcripts exhibiting tissue-specific expression were identified and the top 10 transcripts

348 were selected (S4 Fig). Real-time PCR analysis was performed in order to accurately identify  
349 differential expression of selected transcripts in the data. Expression analysis was carried out  
350 from the selected genes belonging to carbohydrate mechanism, the secondary metabolite  
351 pathway, and the associated transcription factors (Fig 4). These results were consistent with  
352 tissue-specific gene expression data in various tissues. As results, 3 genes were identified in  
353 the qRT-PCR of the seeds to be specifically expressed compared to other tissues. Cell  
354 wall/vacuolar inhibitor of fructosidase 2(C/VIF2) play important roles in carbohydrate  
355 metabolism, stress responses, and sugar signaling. The specific expression of C/VIF2 in early  
356 seeds is implicated in several mechanisms of maturation. Cytochrome P450 83B1 genes  
357 showed the highest expression levels in leaf, followed by root, late seed, and early seed.  
358 Cytochrome P450 83B1 protein is known to be involved in auxin homeostasis and  
359 glucosinolate biosynthesis associated with plant growth and pathogenic responds [42]. Also,  
360 seed biotin-containing protein gene showed the highest expression levels in late seed,  
361 followed by early seed, demonstrating that the protein plays an important role in the  
362 developmental stage of the seed. And organic-cation/carnitine transporter 1 protein gene  
363 expressed high levels in root, followed by leaf and late seed. Organic-cation/carnitine  
364 transporter families are generally characterized as polyspecific transporters involved in the  
365 homeostasis of solutes in animals [43]. Although some publications have suggested that this  
366 protein is known as stress-regulated member of plants and that it is involved in plant growth  
367 [43], little is known about the function, localization, and regulation of plants.

368 To determine the biological function of DEGs during seed development, GO  
369 classification analysis was carried out using Blast2GO. The results showed that 25 functional  
370 groups, including 3 major ontologies, classified 63,192 GO terms annotated by the GO  
371 database: biological process, cellular component, and molecular function. Many of these



372 DEGs were dominant catalytic activity, binding metabolism, cellular processes, cell parts and  
373 cells (S5 Fig). In confirming whether there is specificity for development of seeds in relation  
374 to their transcripts, orthologous *S. tora* genes were applied to gene ontology enrichment  
375 analysis using the AgriGO program. In molecular function of GO ontologies, the level of  
376 binding function was increased in the up-regulated DEGs. Among them, RNA binding  
377 increased to a very high level. In addition, down-regulated DEGs showed an increase in the  
378 catalytic activity function, and they also increased protein kinase activity, transferase activity,  
379 and microtubule motor activity (S5 Fig).

380 To identify specific metabolic pathways that are responsible for the transcriptional  
381 changes of enzymatic genes during seed development of *S. tora*, we performed MapMan  
382 analysis with the expression data of genes showing at least 2-fold differential expression  
383 between seed developmental stages. We made the figure to depict the biological processes of  
384 interest, and display log<sub>2</sub>-normalized expression counts onto pictorial diagrams. Most of the  
385 genes in cell metabolism are involved in cell wall metabolism, lipid metabolism,  
386 carbohydrate metabolism, and secondary metabolism. The dynamic changes in metabolic  
387 pathways during seed development were provided in Fig 5, in which we identified the  
388 downward trend of overall transcription in the seed development process. In particular, it was  
389 clear that lipid metabolism, precursor synthesis, flavonoid metabolisms, and  
390 phenylpropanoids/phenolics metabolisms were down-regulated, while the FA synthesis of  
391 lipid metabolism and the N-msc of secondary metabolism were up-regulated.

392

### 393 **Candidate gene families involved in anthraquinones biosynthesis**

394 *S. tora* is well known for its various therapeutic effects (e.g., for its anti-hypertensive,  
395 diuretic, anti-cancer, anti-microbial and cholesterol-lowering effects). Each effect is caused

396 by various secondary metabolites produced in *S. tora*, the best known of these being  
397 anthraquinone. The biosynthesis of anthraquinone shares isochorismate pathways with  
398 phenylpropanoid and shares MEP/DOXP, MEV, and shikimate pathways with carotenoid and  
399 flavonoid. In addition, the polyketide pathway is an important part of the anthraquinone  
400 biosynthesis. To analyze the active biosynthesis of anthraquinones, we determined the  
401 contents of seven compounds of the anthraquinone biosynthesis pathway in early- and late-  
402 seed tissues. As seeds matured, anthraquinone compounds were more accumulated in late  
403 seed than early seed ([Fig 6 and Table 2](#)). Among the seven compounds, gluco-obtusifolin has  
404 the highest content in seed tissues ([Fig 6 and Table 2](#)). It is well known that aurantio-obtusin  
405 is the most significant active compound [8] and is distributed mainly in the seed [44].  
406 However, we found that low levels of aurantio-obtusin were observed at the early and late  
407 developmental stages. A possible explanation for this reason is that aurantio-obtusin may  
408 accumulate mainly in the matured and/or dry seed.

409 To observe gene expression levels of each parts and to compare the changes in gene  
410 expression levels between different parts, their levels were normalized to the FPKM (reads  
411 per kilobase of exon model per million mapped reads), and transcripts were hierarchically  
412 clustered based on the  $\text{Log}_2(\text{FPKM}+1)$ , allowing us to observe the overall gene expression  
413 pattern ([Fig 7](#)). In our study, there were 337 RNA-Seq and 212 Iso-Seq genes involved in *S.*  
414 *tora* secondary metabolites, and they were classified into five pathways including the  
415 MEP/DOXP, MEV, shikimate, carotenoid, and flavonoid/polyketide ([Fig 7 and S5 Table](#)).  
416 There were 35 RNA-Seq and 24 Iso-Seq genes in *S. tora* for seven enzymes involved in  
417 MEP/DOXP pathway and mevalonate pathway leading to production of precursor  
418 dimethylallyl disphosphate ([Fig 7 and S5 Table](#)). They are also involved in the shikimate  
419 pathway leading to the production of precursor 1,4-dihydroxy-2-naphthoyl-CoA including 40

420 RNA-Seq and 31 Iso-Seq genes for 9 enzymes (DAHPS, DHQS, DHQD/SDH, SMK, EPSP,  
421 CS, ICS, MenE, and MenB). In MEP/DOXP, 13 DXPS (1-deoxy-D-xylulose-5-phosphate  
422 synthase, EC 2.2.1.7) were expressed in anthraquinone synthesis. In them, DN49358\_C0\_g1  
423 was expressed in large amounts up to the early stage of seed, but appeared to be greatly  
424 reduced by the late stage. This gene was also expressed at high levels in leaf and root tissues.  
425 Furthermore, DN27315\_c0\_g1 demonstrated higher levels of gene expression in leaf than in  
426 other tissues. And only three of the 13 DXPS genes showed high levels of expression  
427 independent of tissue and seed development. ISPD, CDPMEK, and ISPF genes were  
428 identified in only 1 and 2, while HDS and HDR were identified in more frequent. HDS and  
429 HDR were identified in genes 8 and 6, and HDS ((E)-4-hydroxy-3-methylbut-2-enyl-  
430 diphosphate synthase, DN48094\_c1\_g1) and HDR (4-hydroxy-3-methylbut-2-enyl-  
431 diphosphate reductase, DN25595\_c0\_g1) showed high levels of expression regardless of  
432 tissue and seed development. In the MEV pathway, ACCA (acetyl-CoA carboxylase) was  
433 identified in 29 genes, and 3 genes (DN51063\_c1\_g1, DN51063\_c2\_g1, and  
434 DN72707\_c0\_g1) sustained high levels of expression independent of tissue and seed  
435 development. Conversely, one HMGR (DN9882\_c0\_g1) was down-stream of expression  
436 level. Except for some genes, ACCA, HMGS, HMGR, MK, PMK, and MPD of expression  
437 levels are down-stream, and 1 of 4 IPPS (isopentenyl-diphosphate delta-isomerase,  
438 DN67602\_c1\_g1) genes showed high level of expression independent of tissue and seed  
439 development.

440 Anthraquinones are also known to be produced from acetyl-CoA and malonyl-CoA  
441 through polyketide pathway in plants. Chalcone synthase (CHS), a type III polyketide  
442 synthase, is an important enzyme involved in the polyketide pathway [45]. We have  
443 identified 27 RNA-Seq and 23 Iso-Seq genes encoding for enzyme involved in type III

444 polyketide synthase ([S5 Table](#)). As a ubiquitous enzyme in higher plants, CHS is known to  
445 produce flavonoids by catalyzing the sequential decarboxylative reaction with 3 malonyl-  
446 CoA and p-coumaroyl-CoA as a starter and extender unit, respectively [46]. It was also  
447 suggested that polyketide synthase could form an anthraquinone precursor using acetyl-CoA  
448 and malonyl-CoA. And the formed precursor, octaketide is cyclized by PKC-encoding  
449 polyketide cyclase, and usually forms three-ring structures named A, B, and C rings [47]. The  
450 formed intermediate is modified by P450 to produce anthraquinone or emodin anthrone, and  
451 also to produce sennoside by modification of glycosyltransferases. These 27 PKS gene sizes  
452 averaged 584.03 bp, and the longest was 1,580 bp. Among them, only 3 genes  
453 (DN50459\_c0\_g1, DN2403\_c0\_g2, and DN50459\_c0\_g2) showed high levels of expression  
454 change in seed development. It seems that these genes are changing a lot in order to make the  
455 backbones of the flavonoid and carotenoid components needed for survival in the later stages  
456 of seed development. In particular, 5 genes (DN17347\_c0\_g1, DN50624\_c4\_g3,  
457 DN69520\_c0\_g1, DN50624\_c4\_g1, and DN50624\_c4\_g4) showed a large amount of  
458 expression in the early part of the seed, whereas in the latter part, the level of expression  
459 decreased sharply, suggesting that those genes play a very important role in the biosynthesis  
460 of the backbone of the material needed in early seed development.

461 In general, glycosylation is carried out at the end of secondary metabolites  
462 biosynthesis and improve the solubility and stability of the secondary metabolites. In nature,  
463 UDP-glycosyltransferases (UGT) normally facilitates glycosylation, and makes the natural  
464 product with glucose at the hydroxyl group [48]. In our study, there were 59 genes in seed  
465 stage of *S. tora*. Based on the results, 33 out of 59 genes showed more expression at the late-  
466 seed than at the early-seed stage, whereas 26 showed more expression at the early-seed stage  
467 ([Fig 7](#) and [S5 Table](#)). The degree of expression of the seven genes (DN131354\_c0\_g1,

468 DN67413\_c0\_g1, DN49988\_c0\_g2, DN50503\_c0\_g2, DN82643\_c0\_g1, DN17331\_c0\_g2,  
469 and DN137099\_c0\_g1) seems to increase rapidly during the growth of the seed, which seems  
470 to be necessary for the process of stockpiling the energy required for seed germination. In  
471 addition, DN17331\_c0\_g2 and DN82643\_c0\_g1 seem to have a great effect on the  
472 glycosylation during seed development because they undergo a significant amount of change.  
473 Conversely, the expression level of the four genes (DN50189\_c2\_g1, DN11235\_c0\_g1,  
474 DN62590\_c0\_g1, and DN76515\_c0\_g1) seemed to decrease rapidly, and the remaining 22  
475 genes were found to be expressed with a relatively small decrease.

476

## 477 **Conflict of interest**

478 The authors declare that they have no conflict of interest.

479

## 480 **Acknowledgements**

481 This work was carried out with the support of National Institute of Agricultural Sciences  
482 [Project no. PJ013818] and Cooperative Research Program for Agriculture Science and  
483 Technology Development [Project title: National Agricultural Genome Program, Project no.  
484 PJ010457], Rural Development Administration, Republic of Korea.

485

## 486 **Author Contributions**

487 **Funding acquisition:** Sang-Ho Kang

488 **Data curation:** Joon-Soo Sim, Chang-Muk Lee, So-Ra Han

489 **Methodology:** So Youn Won, Soo-Jin Kwon, Jung Sun Kim

490 **Writing – original draft:** Sang-Ho Kang, Woo-Haeng Lee

491 **Writing – review & editing:** Sang-Ho Kang, Chang-Kug Kim, Tae-Jin Oh

492

## 493 **References**

- 494 1. Jain R, Sharma P, Jain SC. Chemical analysis of the roots of *Cassia tora*. Asian J  
495 Chem. 2010;22(10):7585-90.
- 496 2. Patil UK, Saraf S, Dixit VK. Hypolipidemic activity of seeds of *Cassia tora* Linn. J  
497 Ethnopharmacol. 2004;90(2-3):249-52.
- 498 3. Pawar HA, D'mello PM. *Cassia tora* Linn.: An overview. Int J Pharmaceut Sci Res.  
499 2011;2(9):2286-91.
- 500 4. Zhao X, Wang Q, Qian Y, Pang L. *Cassia tora* L. (Jue-ming-zi) has anticancer  
501 activity in TCA8113 cells *in vitro* and exerts anti-metastatic effects *in vivo*. Oncol  
502 Lett. 2013;5(3):1036-42.
- 503 5. Jang DS, Lee GY, Kim YS, Lee YM, Kim C-S, Yoo JL, et al. Anthraquinones from  
504 the seeds of *Cassia tora* with inhibitory activity on protein glycation and aldose  
505 reductase. Biol Pharm Bull. 2007;30(11):2207-10.
- 506 6. Shukla SK, Kumar A, Terrence M, Yusuf J, Singh VP, Mishra M. The probable  
507 medicinal usage of *Cassia tora*: An overview. OnLine J Biol Sci. 2013;13(1):13-7.
- 508 7. Jain S, Patil UK. Phytochemical and pharmacological profile of *Cassia tora* Linn. -  
509 An overview. Indian J Nat Prod Resour. 2010;1(4):430-7.
- 510 8. Kim M, Lim SJ, Lee HJ, Nho CW. *Cassia tora* seed extract and its active compound  
511 aurantio-obtusin inhibit allergic responses in IgE-mediated mast cells and  
512 anaphylactic models. J Agric Food Chem. 2015;63(41):9037-46.
- 513 9. Chien S-C, Wu Y-C, Chen Z-W, Yang W-C. Naturally occurring anthraquinones:  
514 Chemistry and therapeutic potential in autoimmune diabetes. Evidence-Based

- 515 Complementary and Alternative Medicine. 2015;2015:1-13.
- 516 10. Kim Y-M, Lee C-H, Kim H-G, Lee H-S. Anthraquinones isolated from *Cassia tora*  
517 (Leguminosae) seed show an antifungal property against phytopathogenic fungi. J  
518 Agric Food Chem. 2004;52:6096-100.
- 519 11. Azelmat J, Larente JF, Grenier D. The anthraquinone rhein exhibits synergistic  
520 antibacterial activity in association with metronidazole or natural compounds and  
521 attenuates virulence gene expression in *Porphyromonas gingivalis*. Arch Oral Biol.  
522 2015;60(2):342-6. Epub 2014/12/03.
- 523 12. Panigrahi GK, Ratnasekhar CH, Mudiam MKR, Vashishtha VM, Raisuddin S, Das  
524 M. Activity-guided chemo toxic profiling of *Cassia occidentalis* (CO) seeds:  
525 Detection of toxic compounds in body fluids of CO-exposed patients and  
526 experimental rats. Chem Res Toxicol. 2015;28:1120-32.
- 527 13. Panigrahi GK, Yadav A, Mandal P, Tripathi A, Das M. Immunomodulatory potential  
528 of rhein, an anthraquinone moiety of *Cassia occidentalis* seeds. Toxicol Lett.  
529 2016;245:15-23.
- 530 14. Wong S-M, Wong MM, Seligmann O, Wagner H. New antihepatotoxic naphtho-  
531 pyrone glycosides from the seeds of *Cassia tora*. Plant Med. 1989;55:276-80.
- 532 15. Yen G-C, Chung D-Y. Antioxidant effects of extracts from *Cassia tora* L. prepared  
533 under different degrees of roasting on the oxidative damage to biomolecules. J Agric  
534 Food Chem. 1999;47:1326-32.
- 535 16. Hyun SK, Lee H, Kang SS, Chung HY, Choi JS. Inhibitory activities of *Cassia tora*  
536 and its anthraquinone constituents on angiotensin-converting enzyme. Phytother Res.  
537 2009;23(2):178-84.
- 538 17. Baba SA, Mohiuddin T, Basu S, Swarnkar MK, Malik AH, Wani ZA, et al.

- 539 Comprehensive transcriptome analysis of *Crocus sativus* for discovery and  
540 expression of genes involved in apocarotenoid biosynthesis. BMC Genomics.  
541 2015;16:698.
- 542 18. D'Agostino N, Pizzichini D, Chiusano ML, Giuliano G. An EST database from  
543 saffron stigmas. BMC Plant Biol. 2007;7:53.
- 544 19. Jain M. Next-generation sequencing technologies for gene expression profiling in  
545 plants. Brief Funct Genomics. 2012;11(1):63-70.
- 546 20. Jo IH, Lee J, Hong CE, Lee DJ, Bae W, Park SG, et al. Isoform sequencing provides  
547 a more comprehensive view of the *Panax ginseng* transcriptome. Genes (Basel).  
548 2017;8(9).
- 549 21. Li J, Harata-Lee Y, Denton MD, Feng Q, Rathjen JR, Qu Z, et al. Long read  
550 reference genome-free reconstruction of a full-length transcriptome from *Astragalus*  
551 *membranaceus* reveals transcript variants involved in bioactive compound  
552 biosynthesis. Cell Discov. 2017;3:17031.
- 553 22. Gonzalez-Garay ML. Transcriptomics and gene regulation: Introduction to isoform  
554 sequencing using pacific biosciences technology (Iso-Seq): Springer; 2016.
- 555 23. Pouladi N, Achour I, Li H, Berghout J, Kenost C, Gonzalez-Garay ML, et al.  
556 Biomechanisms of comorbidity: Reviewing integrative analyses of multi-omics  
557 datasets and electronic health records. Yearb Med Inform. 2016;(1):194-206.
- 558 24. Patel RK, Jain M. NGS QC Toolkit: a toolkit for quality control of next generation  
559 sequencing data. PLoS One. 2012;7(2):e30619.
- 560 25. Schmieder R, Lim YW, Edwards R. Identification and removal of ribosomal RNA  
561 sequences from metatranscriptomes. Bioinformatics. 2012;28(3):433-5.
- 562 26. Haas BJ, Papanicolaou A, Yassour M, Grabherr M, Blood PD, Bowden J, et al. *De*



- 563 *novo* transcript sequence reconstruction from RNA-seq using the Trinity platform for  
564 reference generation and analysis. *Nat Protoc.* 2013;8(8):1494-512.
- 565 27. Li W, Godzik A. Cd-hit: a fast program for clustering and comparing large sets of  
566 protein or nucleotide sequences. *Bioinformatics.* 2006;22(13):1658-9.
- 567 28. Langmead B, Salzberg SL. Fast gapped-read alignment with Bowtie 2. *Nat Methods.*  
568 2012;9(4):357-9.
- 569 29. Li B, Dewey CN. RSEM: accurate transcript quantification from RNA-Seq data with  
570 or without a reference genome. *BMC Bioinformatics.* 2011;12:323.
- 571 30. Anders S, Huber W. Differential expression analysis for sequence count data.  
572 *Genome Biol.* 2010;11:R106.
- 573 31. Altschul SF, Gish W, Miller W, Myers EW, Lipman DJ. Basic local alignment  
574 search tool. *J Mol Biol.* 1990;215:403-10.
- 575 32. Ashburner M, Ball CA, Blake JA, Botstein D, Butler H, Cherry JM, et al. Gene  
576 ontology: tool for the unification of biology. The Gene Ontology Consortium. *Nat*  
577 *Genet.* 2000;25(1):25-9.
- 578 33. Conesa A, Gotz S, Garcia-Gomez JM, Terol J, Talon M, Robles M. Blast2GO: a  
579 universal tool for annotation, visualization and analysis in functional genomics  
580 research. *Bioinformatics.* 2005;21(18):3674-6.
- 581 34. Du Z, Zhou X, Ling Y, Zhang Z, Su Z. agriGO: a GO analysis toolkit for the  
582 agricultural community. *Nucleic Acids Res.* 2010;38(Web Server issue):W64-70.
- 583 35. Livak KJ, Schmittgen TD. Analysis of relative gene expression data using real-time  
584 quantitative PCR and the  $2^{-\Delta\Delta C(T)}$  Method. *Methods.* 2001;25(4):402-8.
- 585 36. Yang CQ, Fang X, Wu XM, Mao YB, Wang LJ, Chen XY. Transcriptional  
586 regulation of plant secondary metabolism. *J Integr Plant Biol.* 2012;54(10):703-12.

- 587 37. Omidbakhshfard MA, Proost S, Fujikura U, Mueller-Roeber B. Growth-regulating  
588 factors (GRFs): A small transcription factor family with important functions in plant  
589 biology. *Mol Plant*. 2015;8(7):998-1010.
- 590 38. Liu J, Hua W, Yang H-L, Zhan G-M, Li R-J, Deng L-B, et al. The BnGRF2 gene  
591 (GRF2-like gene from *Brassica napus*) enhances seed oil production through  
592 regulating cell number and plant photosynthesis. *J Exp Bot*. 2012;63(10):3727-40.
- 593 39. Zhang D-F, Li B, Jia G-Q, Zhang T-F, Dai J-R, Li J-S, et al. Isolation and  
594 characterization of genes encoding GRF transcription factors and GIF transcriptional  
595 coactivators in maize (*Zea mays* L.). *Plant Science*. 2008;175(6):809-17.
- 596 40. Link M, Rausch T, Greiner S. In *Arabidopsis thaliana*, the invertase inhibitors  
597 AtC/VIF1 and 2 exhibit distinct target enzyme specificities and expression profiles.  
598 *FEBS Lett*. 2004;573(1-3):105-9.
- 599 41. Kang SH, Lee JY, Lee TH, Park SY, Kim CK. *De novo* transcriptome assembly of  
600 the Chinese pearl barley, adlay, by full-length isoform and short-read RNA  
601 sequencing. *PLoS One*. 2018;13(12):e0208344.
- 602 42. Hansen CH, Du L, Naur P, Olsen CE, Axelsen KB, Hick AJ, et al. CYP83b1 is the  
603 oxime-metabolizing enzyme in the glucosinolate pathway in *Arabidopsis*. *J Biol*  
604 *Chem*. 2001;276(27):24790-6.
- 605 43. Kufner I, Koch W. Stress regulated members of the plant organic cation transporter  
606 family are localized to the vacuolar membrane. *BMC Res Notes*. 2008;1:43.
- 607 44. Deng Y, Zheng H, Yan Z, Liao D, Li C, Zhou J, et al. Full-length transcriptome  
608 survey and expression analysis of *Cassia obtusifolia* to discover putative genes  
609 related to aurantio-obtusin biosynthesis, seed formation and development, and stress  
610 response. *Int J Mol Sci*. 2018;19(9).

- 611 45. Pandith SA, Dhar N, Rana S, Bhat WW, Kushwaha M, Gupta AP, et al. Functional  
612 promiscuity of two divergent paralogs of type III plant polyketide synthases. *Plant*  
613 *Physiol.* 2016;171(4):2599-619.
- 614 46. Austin MB, Noel JP. The chalcone synthase superfamily of type III polyketide  
615 synthases. *Nat Prod Rep.* 2003;20:79-110.
- 616 47. Rama Reddy NR, Mehta RH, Soni PH, Makasana J, Gajbhiye NA, Ponnuchamy M,  
617 et al. Next generation sequencing and transcriptome analysis predicts biosynthetic  
618 pathway of sennosides from *Senna* (*Cassia angustifolia* Vahl.), a non-model plant  
619 with potent laxative properties. *PLoS One.* 2015;10(6):e0129422.
- 620 48. Ross J, Li Y, Lim E-K, Bowles DJ. Higher plant glycosyltransferases. *Genome Biol.*  
621 2001;2(2):3004.1-.6.
- 622

623 **Table 1.** Assembly statistics of the *S. tora* transcriptome by RNA-Seq and Iso-Seq.

| <b>Assembly statistics</b> | <b>RNA-Seq</b> | <b>Iso-Seq</b> |
|----------------------------|----------------|----------------|
| Number of unigenes         | 118,635        | 39,364         |
| Total size (bp)            | 98,734,027     | 112,216,332    |
| Minimum length (bp)        | 300            | 435            |
| Maximum length (bp)        | 18,622         | 6,814          |
| Average length (bp)        | 832            | 2,851          |
| N50 length (bp)            | 1,082          | 3,513          |
| GC contents (%)            | 39.51          | 38.60          |

625 **Table 2.** Anthraquinone contents in the early and late seeds.

| <b>Compounds</b>  | <b>Formula</b> | <b>RT<sup>a</sup></b> | <b>Contents (ug/g)</b> |                  |
|-------------------|----------------|-----------------------|------------------------|------------------|
|                   |                |                       | <b>Early Seed</b>      | <b>Late Seed</b> |
| Gluco-obtusifolin | C22H22O10      | 5.31                  | 80.72 <sup>b</sup>     | 141.27           |
| Aurantio-obtusin  | C17H14O7       | 5.27                  | 1.07                   | 1.08             |
| Chryso-obtusin    | C19H18O7       | 7.68                  | 1.39                   | 0.69             |
| Obtusin           | C18H16O7       | 8.07                  | 0.83                   | 0.60             |
| Obtusifolin       | C16H12O5       | 8.19                  | 1.38                   | 0.26             |
| Chrysophanol      | C15H10O4       | 10.65                 | 11.39                  | 6.69             |
| Physcion          | C16H12O5       | 11.14                 | 2.02                   | 0.96             |
| Total             | -              | -                     | 98.80                  | 151.55           |

626 <sup>a</sup> indicates retention time.

627 <sup>b</sup> represents mean of three replicate experiments.

628

## 629 **Figure legends**

630

631 **Fig 1. The length distribution of transcripts in *S. tora*.** X and Y axis represent unigene  
632 lengths and percent of unigene length distribution, respectively.

633

634 **Fig 2. Histogram of gene ontology (GO) classification from RNA-Seq and Iso-Seq.** The  
635 results are summarized in three main categories: biological process, molecular function, and  
636 cellular component.

637

638 **Fig 3. Heat map of top 50 differentially expressed genes between early- and late-stages**  
639 **of seed development in *S. tora*.** Heatmap showing differentially expressed genes between  
640 early and late stages of seed development in *S. tora*. Color scale representing normalized  
641 expression values is shown at the bottom.

642

643 **Fig 4. Real-time PCR validation of gene expression obtained via RNA-Seq.** All the real-  
644 time PCR experiments were performed at least three times in each independent biological  
645 experiment (3 replicates). Error bars represent SEM from triplicates.

646

647 **Fig 5. MapMan metabolism overview maps showing differences in transcript levels**  
648 **during seed development.** MapMan software was used to provide a snapshot of modulated  
649 genes over the main metabolic pathways. Log<sub>2</sub> fold changes values are represented. Up-  
650 regulated and down-regulated transcripts are shown in red and blue, respectively.

651

652 **Fig 6. GC-MS analysis of anthraquinone during seed development.** Seven anthraquinone

653 levels in the early seed (A) and in the late seed (B).

654

655 **Fig 7. The up-down of putative genes of anthraquinone-biosynthetic pathway in *S. tora*.**

656 It was normalized to the FPKM to compare the changes in gene expression levels between  
657 different parts of *S. tora*. Total gene expression levels were clustered based on the Log2  
658 (FPKM +1). DXPS, 1-Deoxy-D-xylulose-5-phosphate synthase (EC 2.2.1.7); DXR, 1-Deoxy-  
659 D-xylulose-5-phosphate reductoisomerase (EC 1.1.1.267); ISPD, 2-C-Methyl-D-erythritol 4-  
660 phosphate cytidyltransferase (EC 2.7.7.60); CDPMEK, 4-Diphosphocytidyl-2-C-methyl-D-  
661 erythritol kinase (EC 2.7.1.148); ISPF, 2-C-Methyl-D-erythritol 2,4-cyclodiphosphate  
662 Synthase (EC 4.6.1.12); HDS, (E)-4-Hydroxy-3-methylbut-2-enyl-diphosphate synthase (EC  
663 1.17.7.1); HDR, 4-Hydroxy-3-methylbut-2-enyl diphosphate reductase (EC 1.17.1.2); ACCA,  
664 Acetyl-CoA carboxylase (EC 6.4.1.2); HMGS, Hydroxymethylglutaryl-CoA synthase (EC  
665 2.3.3.10); HMGR, Hydroxymethylglutaryl-CoA reductase (EC 1.1.1.34); MK, Mevalonate  
666 kinase (EC 2.7.1.36); PMK, Phosphomevalonate kinase (EC 2.7.4.2); MPD, Methyl parathion  
667 hydrolase (EC 3.1.8.1); IPPS, Isopentenyl-diphosphate delta-isomerase (EC 5.3.3.2);  
668 DAHPS, 3-Deoxy-7-phosphoheptulonate synthase (EC 2.5.1.54); DHQS, 3-Dehydroquininate  
669 synthase (EC 4.2.3.4); DHQD/SDH, 3-Dehydroquininate dehydratase/shikimate dehydrogenase  
670 (EC 4.2.1.10/1.1.1.25); SMK, Shikimate kinase (EC 2.7.1.71); EPSP, 3-Phosphoshikimate 1-  
671 carboxyvinyltransferase (EC 2.5.1.19); CS, Chorismate synthase (EC 4.2.3.5); ICS,  
672 Isochorismate synthase (EC 5.4.4.2); PHYLLO, 2-Succinyl-5-enolpyruvyl-6-hydroxy-3-  
673 cyclohexene-1-carboxylic acid synthase (EC 2.2.1.9); MenE, 2-Succinylbenzoate-CoA ligase  
674 (EC 6.2.1.26); MenB, 1,4-Dihydroxy-2-naphthoyl-CoA synthase (EC 4.1.3.36); GGPS,  
675 Geranylgeranyl diphosphate synthase (EC 2.5.1.1); PSY, Phytoene synthase (EC 2.5.1.32);  
676 PDS, Phytoene desaturase (EC 1.3.99.30); ZDS, Zeta-carotene desaturase (EC 1.3.5.6);

677 LYCB, Lycopene beta-cyclase (EC 5.5.1.19); LYCE, Lycopene epsilon-cyclase (EC  
678 5.5.1.18); BCH, Beta-carotene hydroxylase (EC 1.14.13.129); ZEP, Zeaxanthin epoxidase  
679 (EC 1.14.15.21); PAL, Phenylalanine ammonia-lyase (EC 4.3.1.24); C4H, Cinnamate-4-  
680 hydroxylase (EC 1.14.13.11); 4CL, 4-Coumarate-CoA ligase (EC 6.2.1.12); and CHS,  
681 Chalcone synthase (EC 2.3.1.74).

682



## 683 **Supporting information**

684 **S1 Table. Gene-specific primers used for tissue-specific qRT-PCR.**

685 **S2 Table. General properties of the reads produced by Illumina Hiseq 2500 sequencing**  
686 **platform.**

687 **S3 Table. General properties of the reads produced by PacBio sequencing platform.**

688 **S4 Table. Tissue-enriched and specific transcription factors (TFs) distribution of each**  
689 **tissue.**

690 **S5 Table. Gene associated with the secondary metabolite pathway in *S. tora*.**

691 **S1 Fig. The distribution of annotated unigenes by various public protein databases.**

692 Venn diagram showing the proportion of annotated unigenes in NCBI Nr, KEGG, Swiss-  
693 Prot, and GO databases with RNA-Seq (A) and Iso-Seq (B).

694 **S2 Fig. Species distribution of the top BLAST hits.** Top-hit species from RNA-Seq and  
695 Iso-Seq were calculated based on sequence alignments with the lowest E-value obtained from  
696 BLAST.

697 **S3 Fig. Distribution of TF families of *S. tora*.** Distribution of transcripts (3,284 for RNA-  
698 Seq and 3,576 for Iso-Seq) that encode for transcription factors (A). Number of transcripts  
699 exhibiting specific expression in different tissues has been indicated by bar and table (B).  
700 Tissue-specific shows 10-fold higher FPKM in one tissue compared with three tissues, and  
701 tissue-enriched represents 5-fold higher FPKM compared with other tissues.

702 **S4 Fig. Heatmaps representing the top 10 genes that showed tissue-specific expression in**  
703 **the *S. tora* leaf, root, and early and late seeds.** Red represents high abundance and green  
704 represents low abundance.

705 **S5 Fig. AgriGo analysis of upregulated and downregulated genes during seed**

706 **development.** A total of 4,935 (up-regulated, **A**) and 9,890 (down-regulated, **B**) genes with  
707 Molecular terms are represented by increasingly red colors. GO term enrichment was  
708 performed using single enrichment analysis (SEA) tool on AgriGo  
709 (<http://bioinfo.cau.edu.cn/agriGo/>). Box colors indicates levels of statistical significance:  
710 yellow=0.05; orange=e-05; and red=e-09.

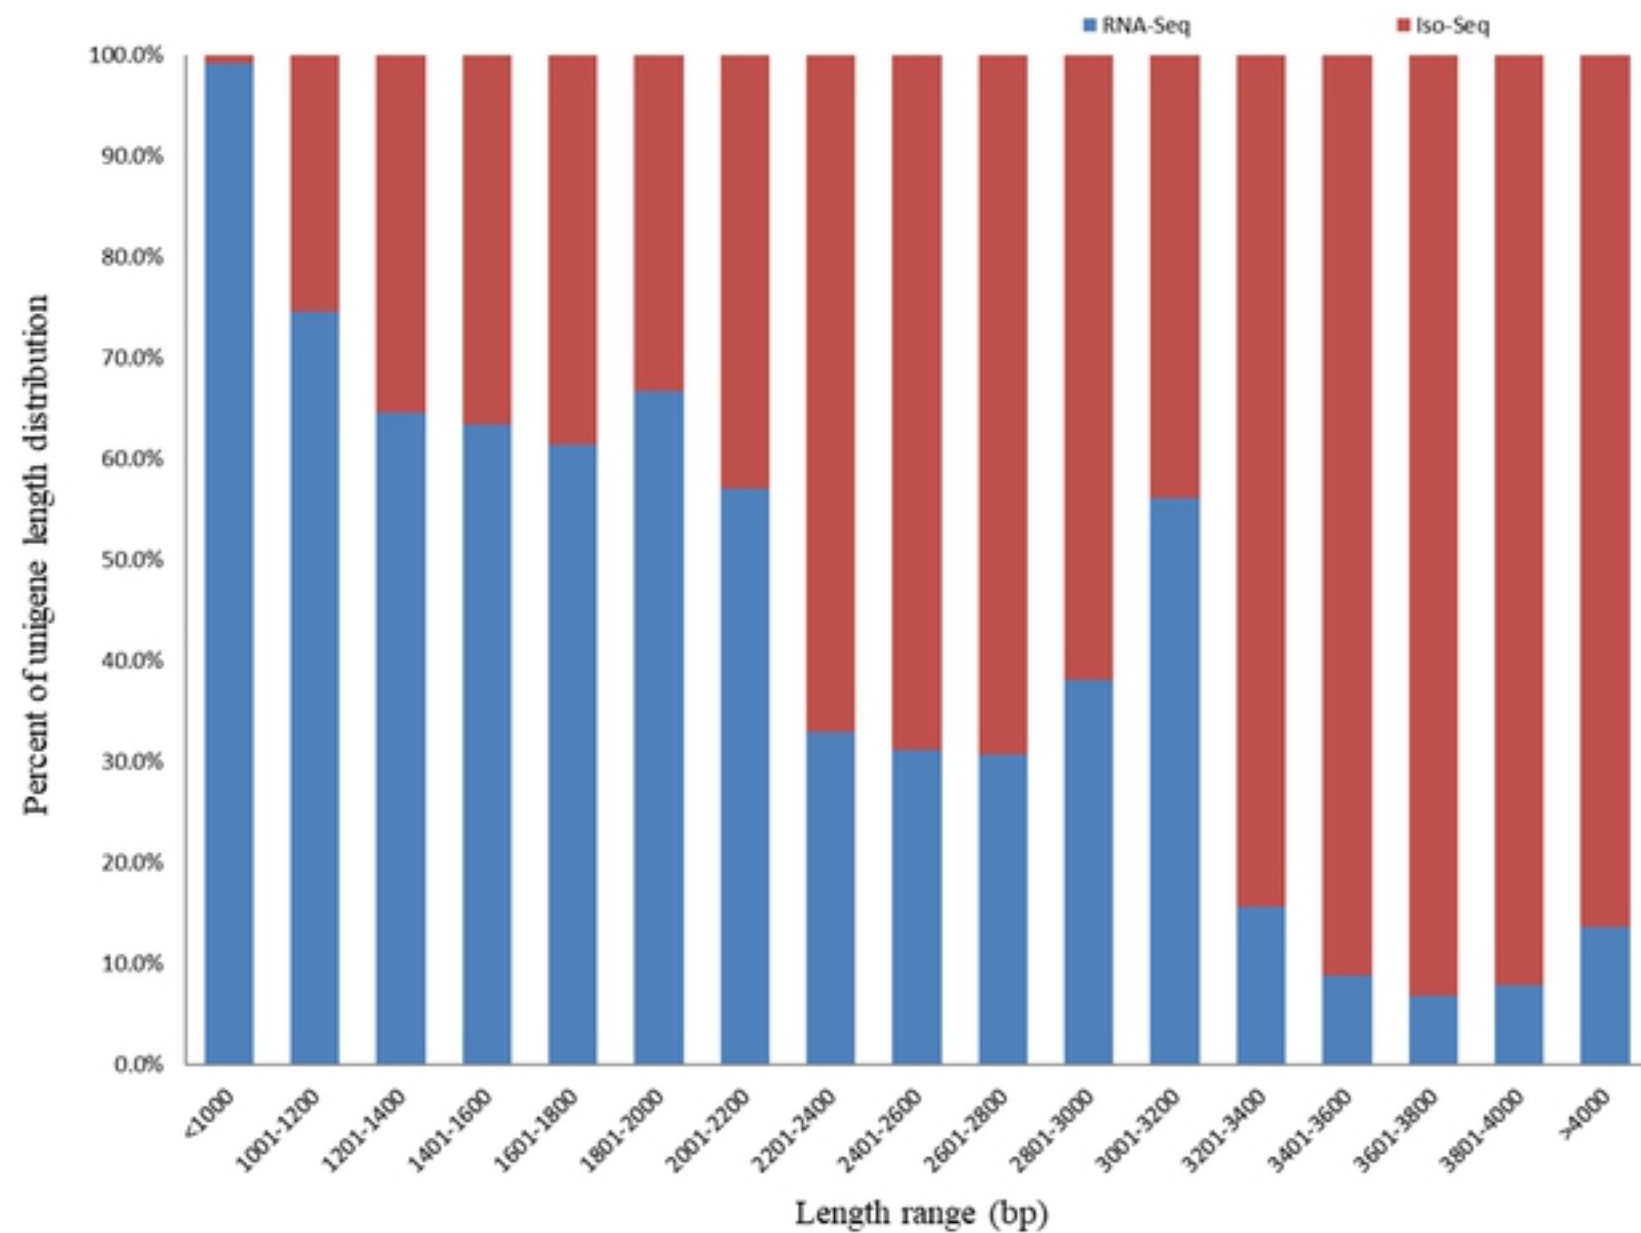

Figure 1

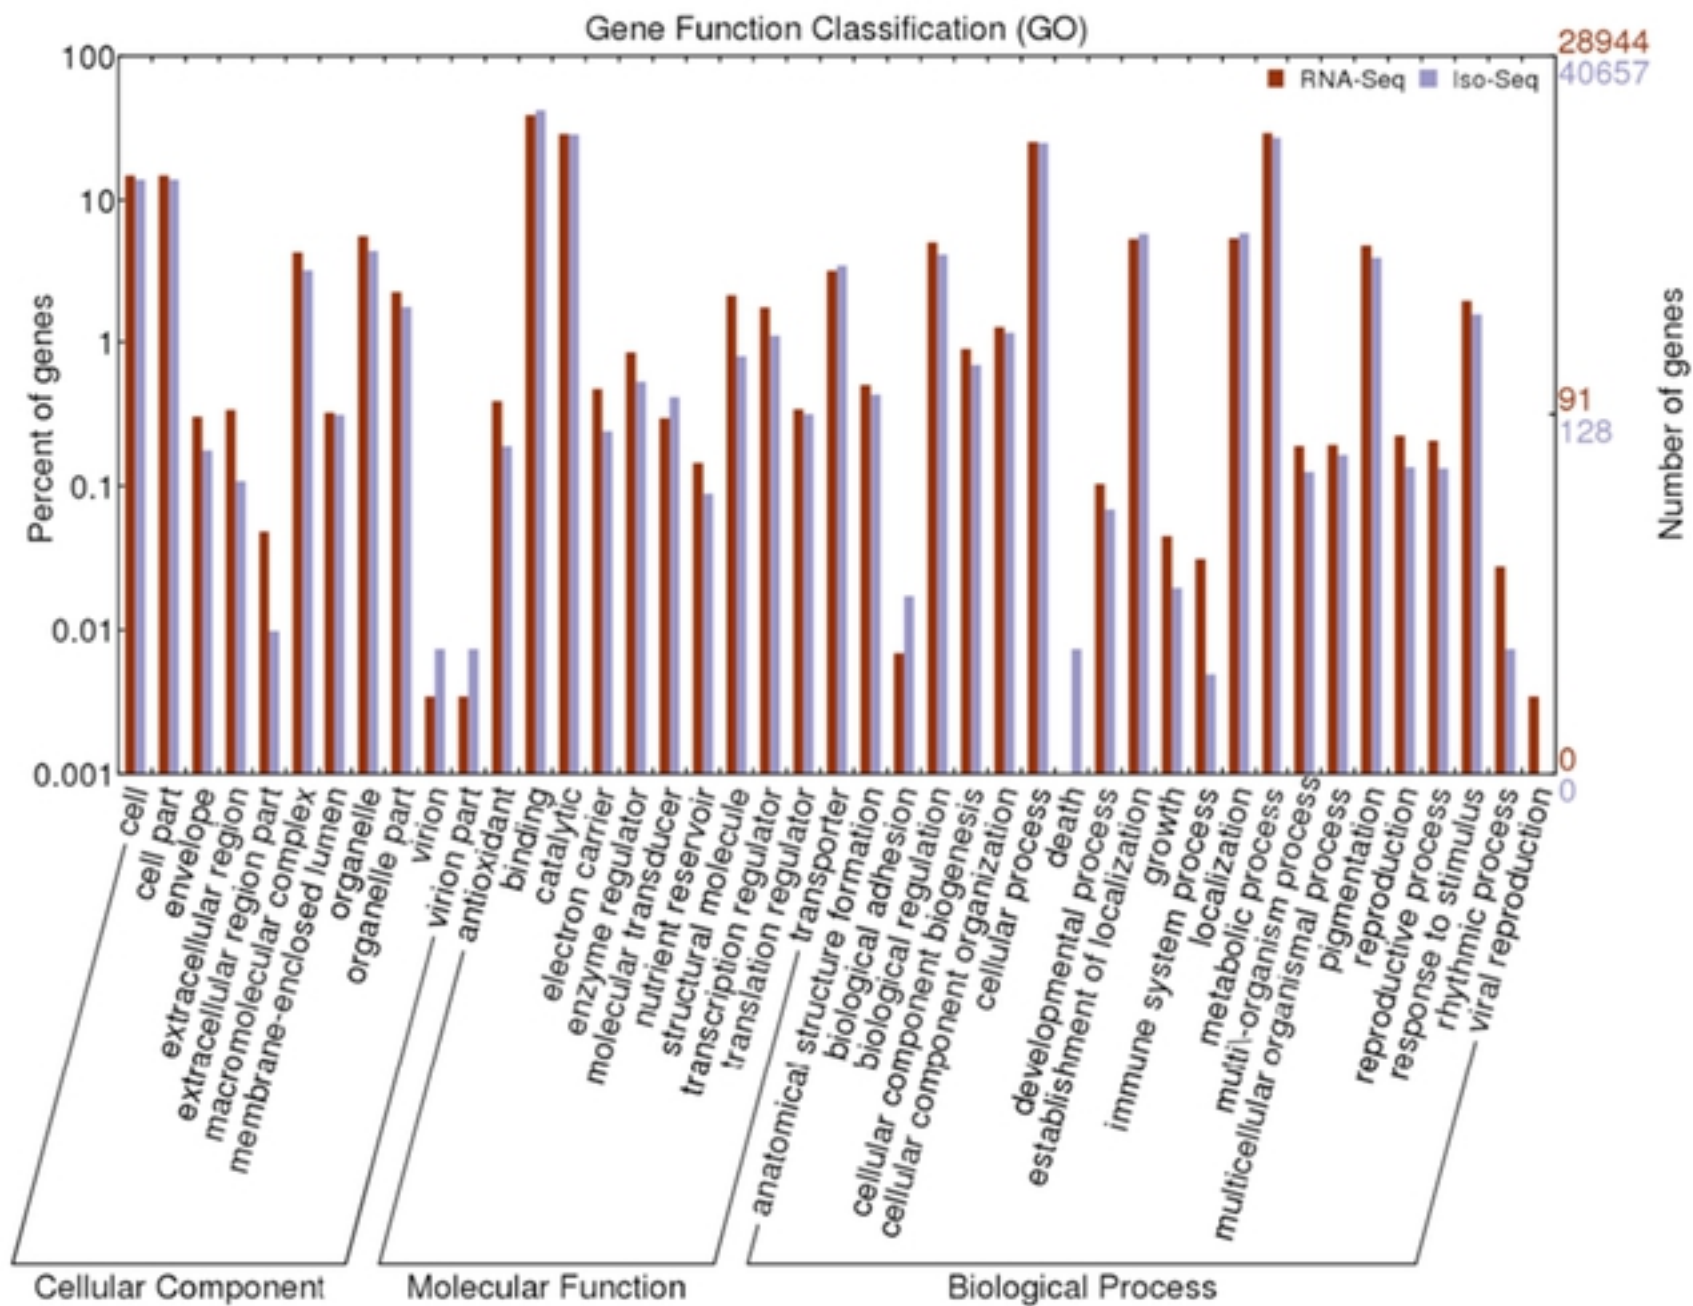

Figure 2

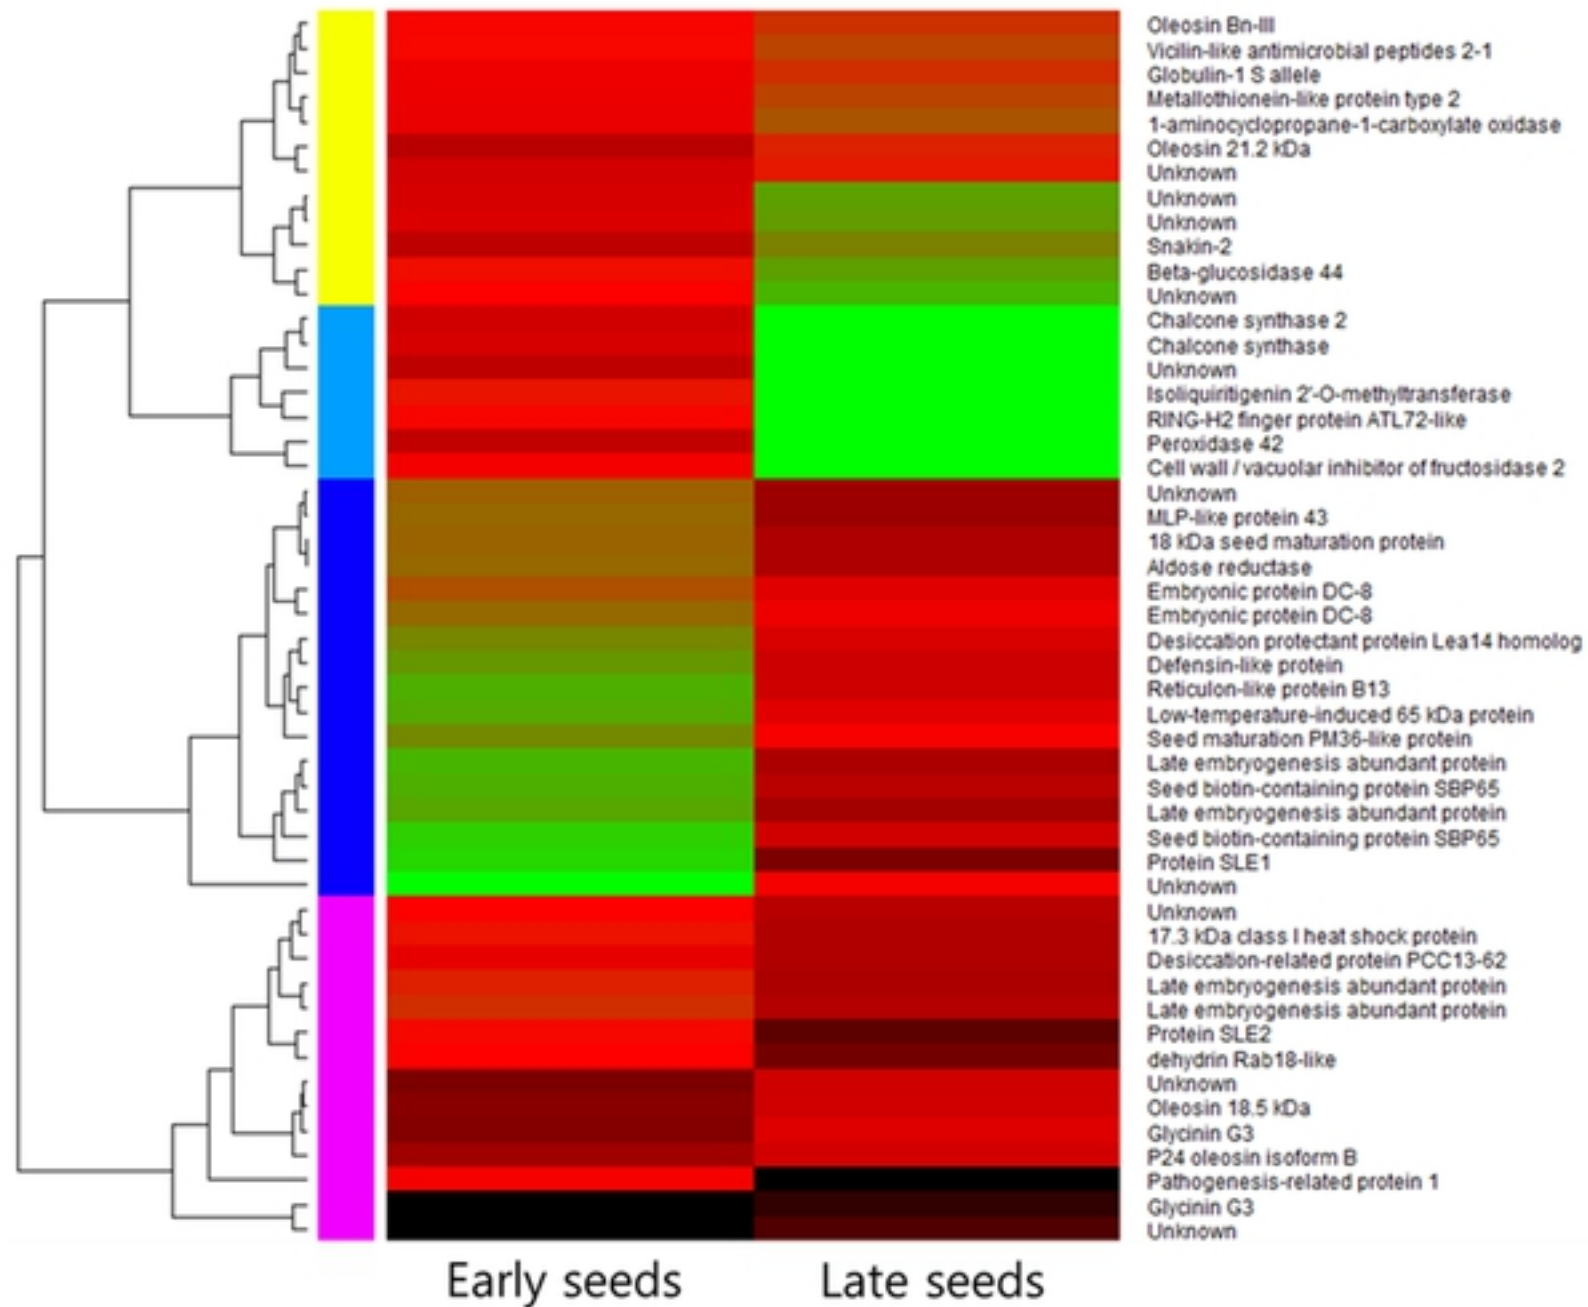

Figure 3

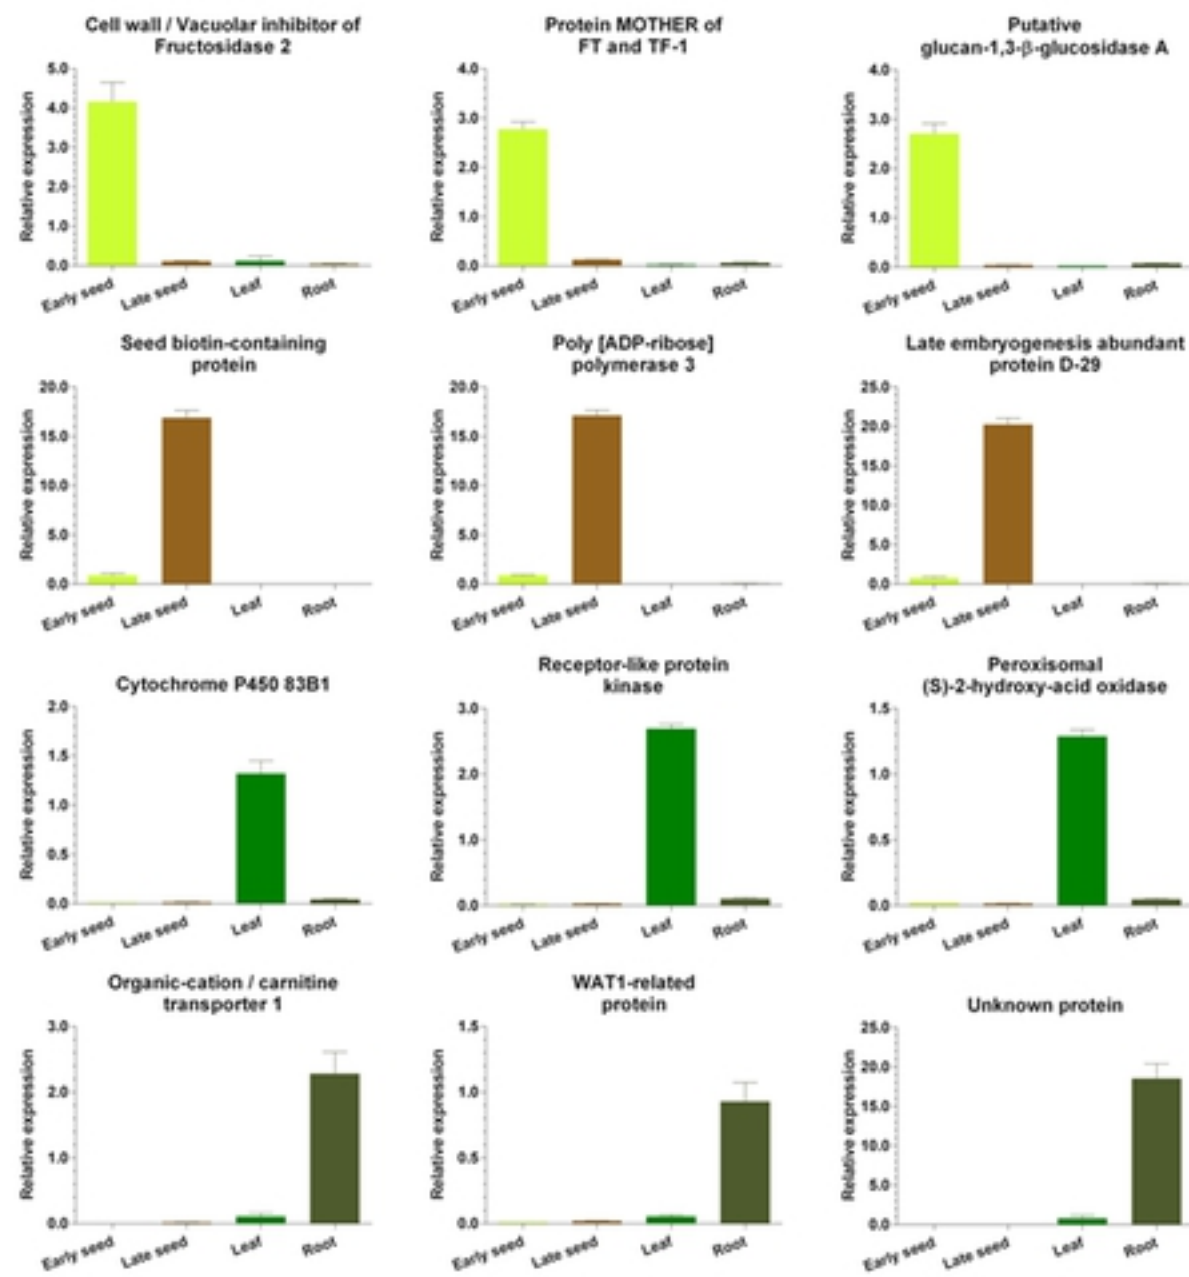

Figure 4

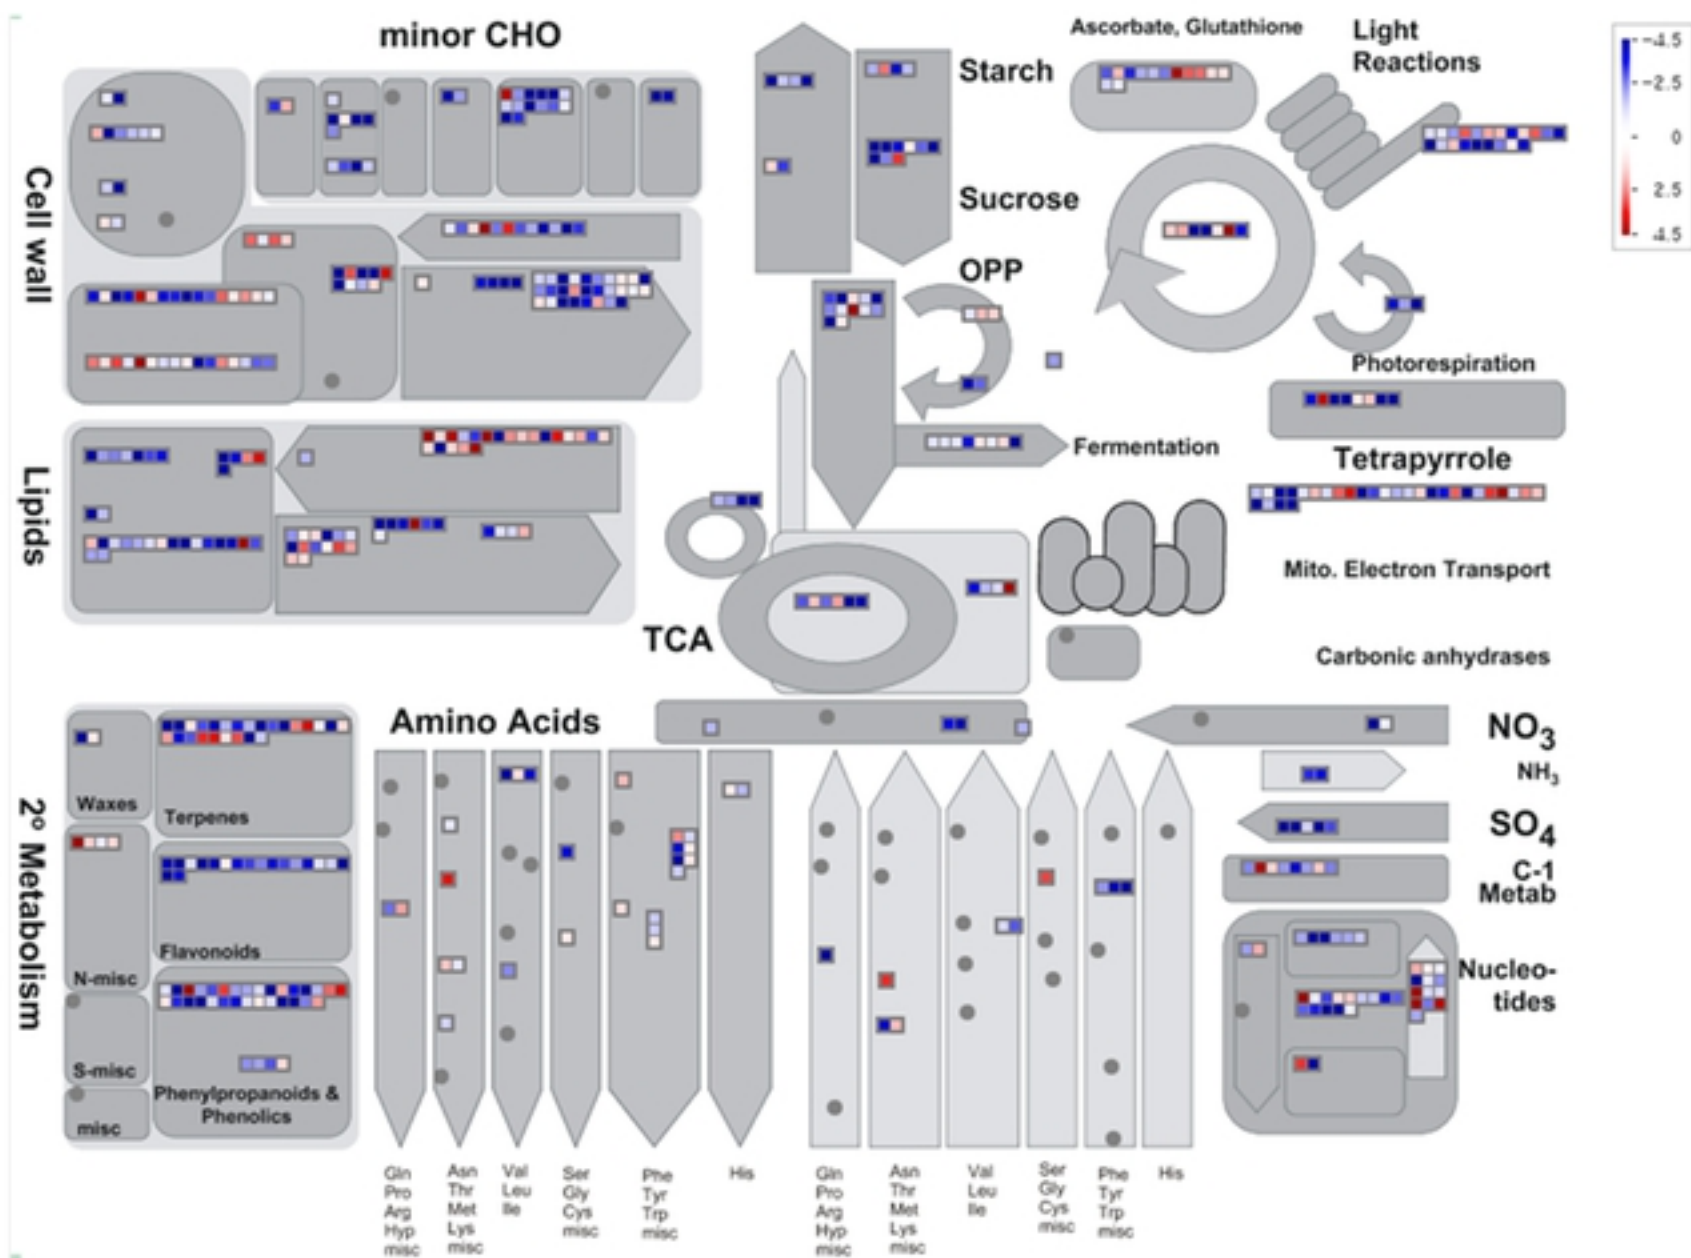

Figure 5

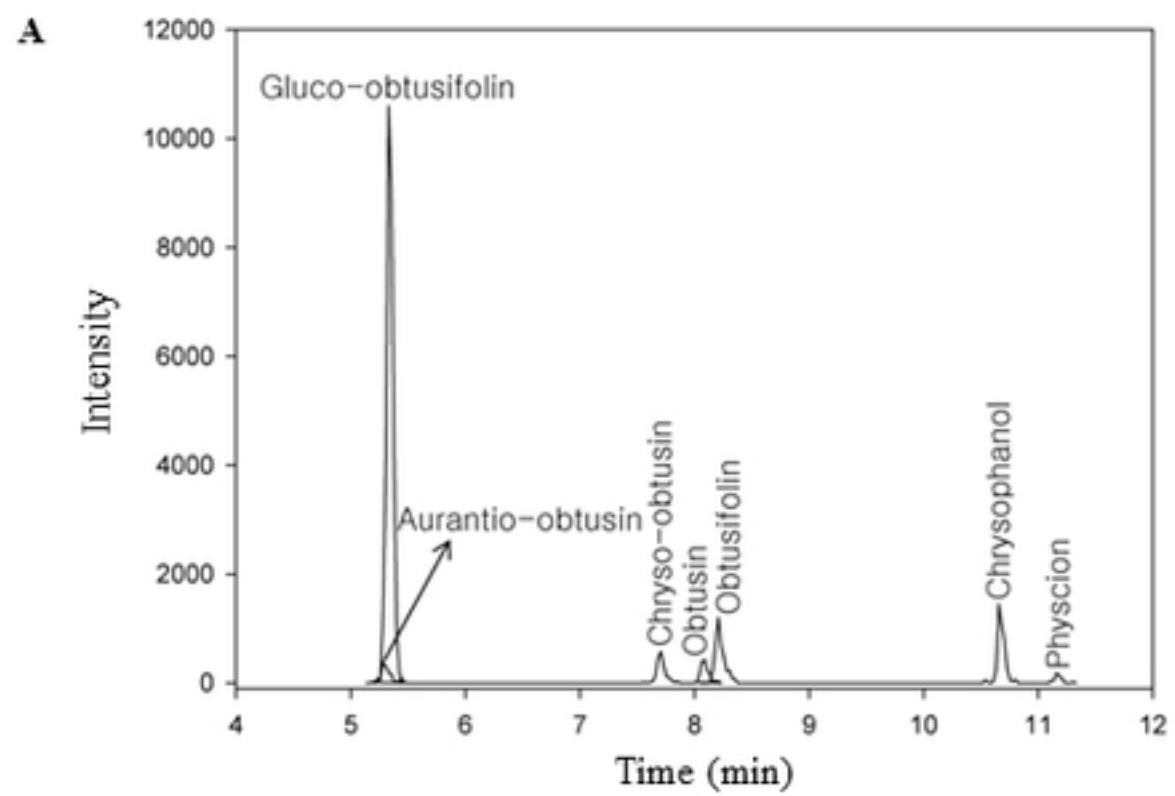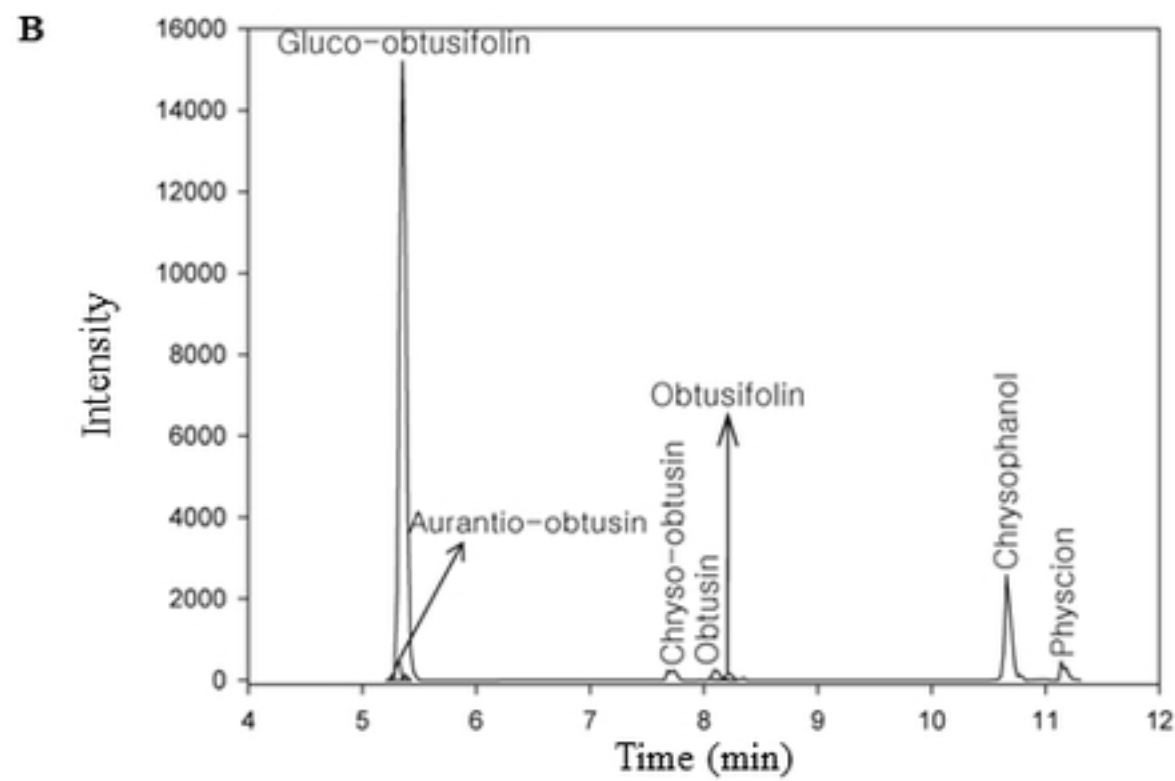

Figure 6



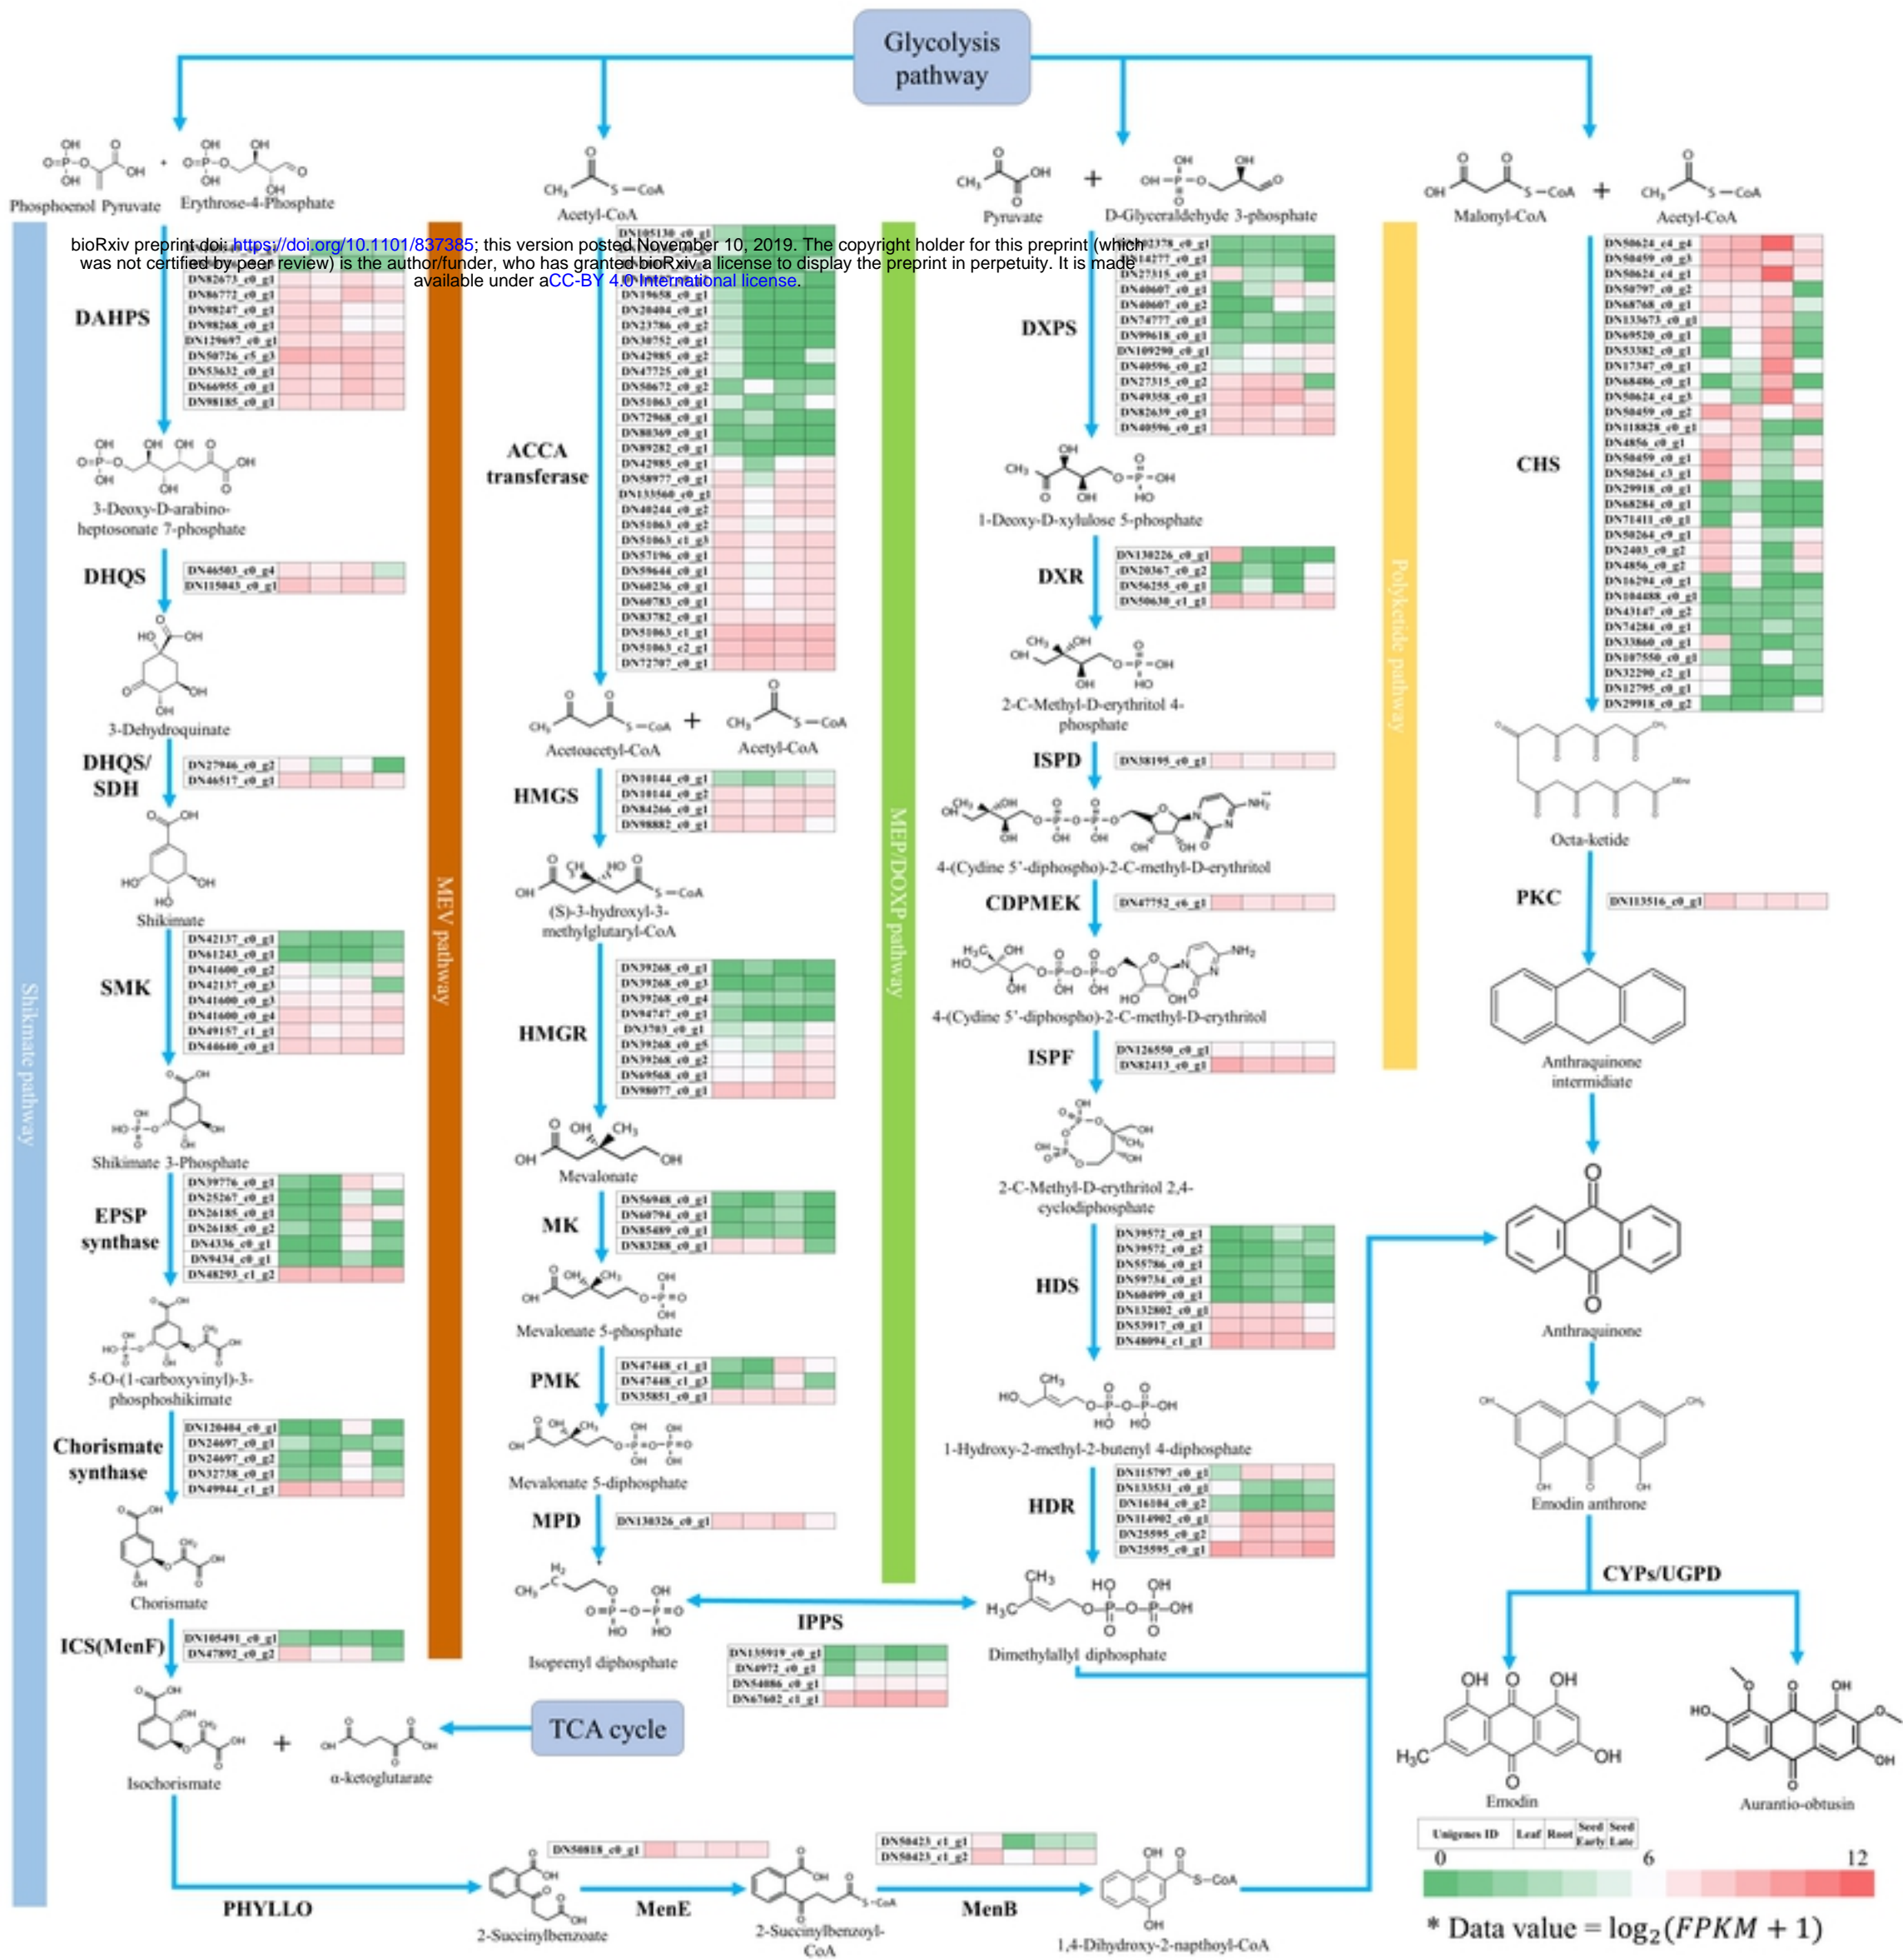

Figure 7
